# Supplementary material for: Estimated number of lives directly saved by COVID-19 vaccination programs in the WHO European Region, December 2020 to March 2023
Source: bioRxiv or medRxiv preprint supplement (doi:10.1101/2024.01.12.24301206), 2024-01-13
Supplement: Supplementary file [file media-1.pdf]

Supplementary material for:

Estimated number of lives directly saved by COVID-19 vaccination programs in the WHO European Region, December 2020 to March 2023

## [Additional text](#)

### Results

#### Reported mortality

Different circulating variants had varying impact on cumulative COVID-19 mortality rates in all age-groups, with Omicron causing the highest cumulative mortality risk (157 per 100,000) in all age-groups, and Alpha (91 per 100,00) and Delta causing the lowest (79 per 100,00). Although Omicron caused the highest number of infections, it has been the longest variant period recorded, the highest number of reported deaths per variant months were during the Delta period (**Error! Reference source not found.** A, D, Table 2). The reported cumulative mortality risk per 100,000 population in those aged  $\geq 60$  years ranged from 303 per 100,000 during the Delta period to 621 per 100,000 during the Omicron period. For those aged  $\geq 80$  years, cumulative mortality rate ranged from 253 per 100,000 (Delta) to 865 per 100,000 (Omicron) (**Error! Reference source not found.**).

Important differences in cumulative COVID-19 mortality risk over the study period were visible across the countries of the Region. Until week 12/2023, North Macedonia recorded the highest cumulative mortality risk (1,473 per 100,000) among those aged  $\geq 60$  years, followed by Hungary (1,401 per 100,000) and Slovakia (1,218 per 100,000). The countries with the lowest cumulative COVID-19 mortality rate in this age-group ( $\geq 60$  years) were in the Netherlands (Kingdom of) (267 per 100,000) followed by Iceland (295 per 100,000) and Malta (372 per 100,000). The cumulative age-specific mortality rates for 60-69; 69-79 and  $>80$  years are presented in Supplementary Table 2.

Among the 50 to 59 years age-groups, North Macedonia (282 per 100,000), Hungary (270 per 100,000) and Slovakia (194 per 100,000) recorded the highest cumulative mortality risk per 100,000 population. The countries with the lowest mortality risk in these age-groups were Iceland, Netherlands (Kingdom of the) (both 14 per 100,000) followed by Malta (17 per 100,000). Among the 25 to 49 years age-groups, North Macedonia (64 per 100,000), Hungary (52 per 100,000) and Latvia, Romania (both 36 per 100,000) recorded the highest mortality risk per 100,000 population. The countries with the lowest cumulative mortality risk in these age-groups were Belgium and Switzerland (both 3 per 100,000), the Netherlands (Kingdom of the) (2 per 100,000) and Iceland (1 per 100,000) (Supplementary Table 3).

## Vaccination roll-out

When considering vaccination coverage by countries, areas and territories (CAT) the highest complete series vaccination rate administered in those aged  $\geq 60$  years was seen in Ireland, Israel, United Kingdom (England, Scotland) (all  $>99\%$ ), followed by Denmark (99%) and Malta (97%). Those with the lowest vaccination coverage in this age-group were Romania (40%), Republic of Moldova (39%) and Ukraine (38%). When considering the youngest age-group, those with the highest coverage of complete series were France and Israel (both 89%), Ireland and Italy (both 85%), whereas Slovakia (50%), Slovenia (47%) and Romania (37%) had the lowest uptake (Supplementary Table 3).

The vaccination programs that were rolled out fastest were in Belgium, Denmark, Iceland, Ireland, Israel, Malta, Netherlands (Kingdom of the) and United Kingdom (England, Scotland), who vaccinated at least 90% of their population aged  $\geq 60$  years and older with at least one dose within 30 weeks, the slowest were Republic of Moldova, North Macedonia, and Kosovo<sup>[1]</sup> (Supplementary Figure 1).

---

<sup>[1]</sup> All references to Kosovo in this document should be understood to be in the context of the United Nations Security Council resolution 1244 (1999).

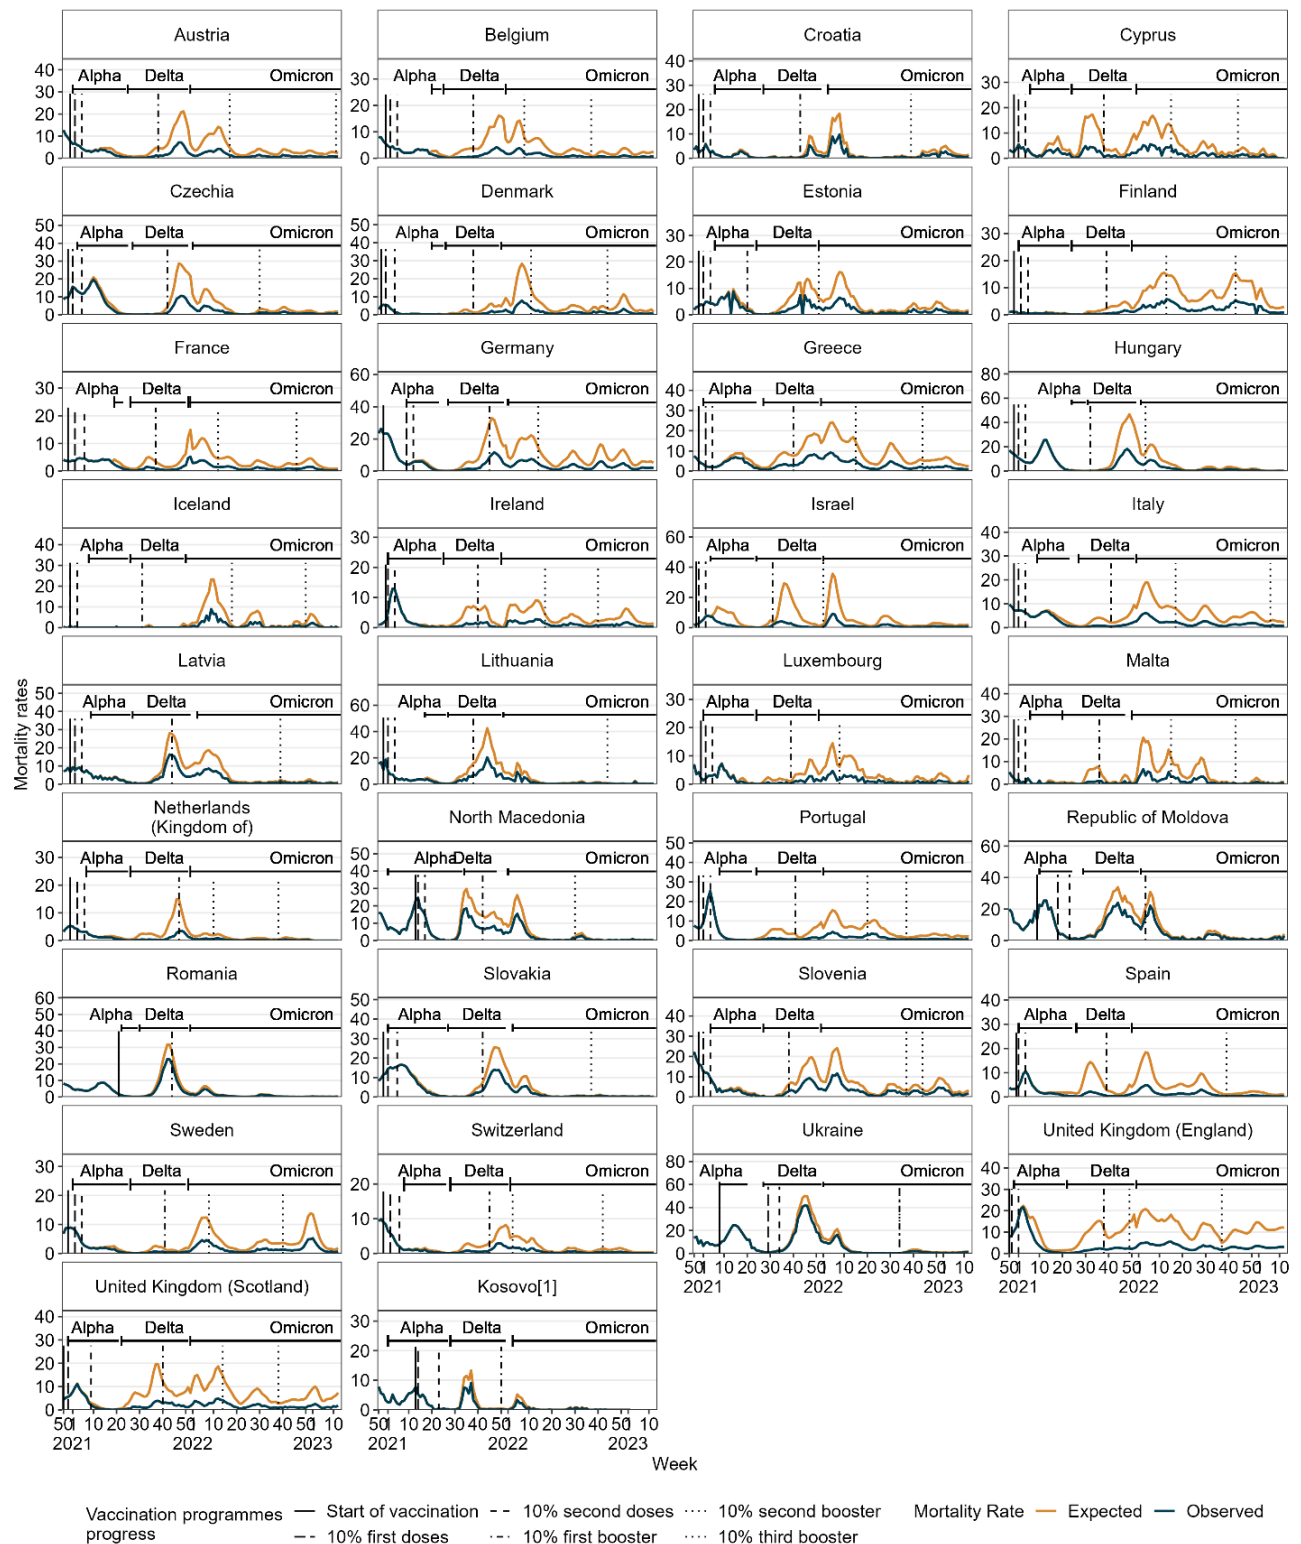

[1] All references to Kosovo in this document should be understood to be in the context of the United Nations Security Council resolution 1244 (1999).

Supplementary Figure 1: Number of observed deaths and lives saved in population aged 25 and older, in context of circulating VOC and progress in vaccination, in 34 countries, areas and territories (CAT) in the European Region, from week 50/2020 to 12/2023.

Supplementary table 1: Summary table of each countries, areas and territories (CAT) in the WHO European Region with data availability and whether they were included in the analysis. Finer older refers to the presence of data relating to finer age older age groups, namely 60-69 years, 70-79 years and ≥80 years.

| Countries, areas and territories | Age group   | Data type |             |                  | Included in full or partial analysis? |
|----------------------------------|-------------|-----------|-------------|------------------|---------------------------------------|
|                                  |             | Mortality | Vaccination | Variant          |                                       |
| Albania                          | 25-49       | No        | No          | Yes <sup>1</sup> | Partial                               |
|                                  | 50-59       | No        | No          | Yes <sup>1</sup> | Partial                               |
|                                  | ≥60         | No        | No          | Yes <sup>1</sup> | Partial                               |
|                                  | Finer older | No        | No          | Yes <sup>1</sup> | Partial                               |
| Armenia                          | 25-49       | No        | Yes         | Yes              | No                                    |
|                                  | 50-59       | No        | Yes         | Yes              | No                                    |
|                                  | ≥60         | No        | Yes         | Yes              | No                                    |
|                                  | Finer older | No        | Yes         | Yes              | No                                    |
| Austria                          | 25-49       | Yes       | Yes         | Yes              | Full                                  |
|                                  | 50-59       | Yes       | Yes         | Yes              | Full                                  |
|                                  | ≥60         | Yes       | Yes         | Yes              | Full                                  |
|                                  | Finer older | Yes       | Yes         | Yes              | Full                                  |
| Azerbaijan                       | 25-49       | No        | No          | No               | No                                    |
|                                  | 50-59       | No        | No          | No               | No                                    |
|                                  | ≥60         | No        | No          | No               | No                                    |
|                                  | Finer older | No        | No          | No               | No                                    |
| Belarus                          | 25-49       | Yes       | No          | No               | No                                    |
|                                  | 50-59       | Yes       | No          | No               | No                                    |
|                                  | ≥60         | Yes       | No          | No               | No                                    |
|                                  | Finer older | Yes       | No          | No               | No                                    |
| Belgium                          | 25-49       | Yes       | Yes         | Yes              | Full                                  |
|                                  | 50-59       | Yes       | Yes         | Yes              | Full                                  |

| Countries, areas and territories    | Age group   | Data type        |             |         | Included in full or partial analysis? |
|-------------------------------------|-------------|------------------|-------------|---------|---------------------------------------|
|                                     |             | Mortality        | Vaccination | Variant |                                       |
|                                     | ≥60         | Yes              | Yes         | Yes     | Full                                  |
|                                     | Finer older | Yes              | Yes         | Yes     | Full                                  |
| Bosnia and Herzegovina <sup>3</sup> | 25-49       | Yes              | No          | Yes     | No                                    |
|                                     | 50-59       | Yes              | No          | Yes     | No                                    |
|                                     | ≥60         | Yes              | Yes         | Yes     | No                                    |
|                                     | Finer older | Yes              | No          | Yes     | No                                    |
|                                     |             |                  |             |         |                                       |
| Bulgaria                            | 25-49       | No               | Yes         | Yes     | No                                    |
|                                     | 50-59       | No               | Yes         | Yes     | No                                    |
|                                     | ≥60         | No               | Yes         | Yes     | No                                    |
|                                     | Finer older | No               | Yes         | Yes     | No                                    |
| Croatia                             | 25-49       | Yes <sup>6</sup> | Yes         | Yes     | Full                                  |
|                                     | 50-59       | Yes <sup>6</sup> | Yes         | Yes     | Full                                  |
|                                     | ≥60         | Yes <sup>6</sup> | Yes         | Yes     | Full                                  |
|                                     | Finer older | Yes <sup>6</sup> | Yes         | Yes     | Full                                  |
| Cyprus                              | 25-49       | Yes              | Yes         | Yes     | Full                                  |
|                                     | 50-59       | Yes              | Yes         | Yes     | Full                                  |
|                                     | ≥60         | Yes              | Yes         | Yes     | Full                                  |
|                                     | Finer older | Yes              | Yes         | Yes     | Full                                  |
| Czechia                             | 25-49       | Yes              | Yes         | Yes     | Full                                  |
|                                     | 50-59       | Yes              | Yes         | Yes     | Full                                  |
|                                     | ≥60         | Yes              | Yes         | Yes     | Full                                  |
|                                     | Finer older | Yes              | Yes         | Yes     | Full                                  |
| Denmark                             | 25-49       | Yes              | Yes         | Yes     | Full                                  |
|                                     | 50-59       | Yes              | Yes         | Yes     | Full                                  |

| Countries, areas and territories | Age group   | Data type |             |         | Included in full or partial analysis? |
|----------------------------------|-------------|-----------|-------------|---------|---------------------------------------|
|                                  |             | Mortality | Vaccination | Variant |                                       |
|                                  | ≥60         | Yes       | Yes         | Yes     | Full                                  |
|                                  | Finer older | Yes       | Yes         | Yes     | Full                                  |
| Estonia                          | 25-49       | Yes       | Yes         | Yes     | Full                                  |
|                                  | 50-59       | Yes       | Yes         | Yes     | Full                                  |
|                                  | ≥60         | Yes       | Yes         | Yes     | Full                                  |
|                                  | Finer older | Yes       | Yes         | Yes     | Full                                  |
| Finland                          | 25-49       | Yes       | Yes         | Yes     | Full                                  |
|                                  | 50-59       | Yes       | Yes         | Yes     | Full                                  |
|                                  | ≥60         | Yes       | Yes         | Yes     | Full                                  |
|                                  | Finer older | Yes       | Yes         | Yes     | Full                                  |
| France                           | 25-49       | Yes       | Yes         | Yes     | Full                                  |
|                                  | 50-59       | Yes       | Yes         | Yes     | Full                                  |
|                                  | ≥60         | Yes       | Yes         | Yes     | Full                                  |
|                                  | Finer older | Yes       | Yes         | Yes     | Full                                  |
| Georgia                          | 25-49       | No        | No          | No      | No                                    |
|                                  | 50-59       | No        | No          | No      | No                                    |
|                                  | ≥60         | No        | Yes         | No      | No                                    |
|                                  | Finer older | No        | No          | No      | No                                    |
| Germany                          | 25-49       | Yes       | No          | Yes     | No                                    |
|                                  | 50-59       | Yes       | No          | Yes     | No                                    |
|                                  | ≥60         | Yes       | Yes         | Yes     | Full                                  |
|                                  | Finer older | Yes       | No          | Yes     | No                                    |
| Greece                           | 25-49       | Yes       | Yes         | Yes     | Full                                  |
|                                  | 50-59       | Yes       | Yes         | Yes     | Full                                  |

| Countries, areas and territories | Age group   | Data type        |                  |                  | Included in full or partial analysis? |
|----------------------------------|-------------|------------------|------------------|------------------|---------------------------------------|
|                                  |             | Mortality        | Vaccination      | Variant          |                                       |
|                                  | ≥60         | Yes              | Yes              | Yes              | Full                                  |
|                                  | Finer older | Yes              | Yes              | Yes              | Full                                  |
| Hungary                          | 25-49       | Yes              | Yes              | Yes              | Full                                  |
|                                  | 50-59       | Yes              | Yes              | Yes              | Full                                  |
|                                  | ≥60         | Yes              | Yes              | Yes              | Full                                  |
|                                  | Finer older | Yes              | Yes              | Yes              | Full                                  |
| Iceland                          | 25-49       | Yes <sup>6</sup> | Yes              | Yes              | Full                                  |
|                                  | 50-59       | Yes <sup>6</sup> | Yes              | Yes              | Full                                  |
|                                  | ≥60         | Yes <sup>6</sup> | Yes              | Yes              | Full                                  |
|                                  | Finer older | Yes              | Yes              | Yes              | No                                    |
| Ireland                          | 25-49       | Yes              | Yes              | Yes              | Full                                  |
|                                  | 50-59       | Yes              | Yes              | Yes              | Full                                  |
|                                  | ≥60         | Yes              | Yes              | Yes              | Full                                  |
|                                  | Finer older | Yes              | Yes              | Yes              | Full                                  |
| Israel                           | 25-49       | Yes <sup>6</sup> | Yes <sup>6</sup> | Yes <sup>2</sup> | Full                                  |
|                                  | 50-59       | Yes <sup>6</sup> | Yes <sup>6</sup> | Yes <sup>2</sup> | Full                                  |
|                                  | ≥60         | Yes <sup>6</sup> | Yes <sup>6</sup> | Yes <sup>2</sup> | Full                                  |
|                                  | Finer older | No <sup>6</sup>  | No <sup>6</sup>  | Yes <sup>2</sup> | No                                    |
| Italy                            | 25-49       | Yes              | Yes              | Yes              | Full                                  |
|                                  | 50-59       | Yes              | Yes              | Yes              | Full                                  |
|                                  | ≥60         | Yes              | Yes              | Yes              | Full                                  |
|                                  | Finer older | Yes              | Yes              | Yes              | Full                                  |
| Kazakhstan                       | 25-49       | No               | No               | Yes              | No                                    |
|                                  | 50-59       | No               | No               | Yes              | No                                    |

| Countries, areas and territories | Age group   | Data type        |             |         | Included in full or partial analysis? |
|----------------------------------|-------------|------------------|-------------|---------|---------------------------------------|
|                                  |             | Mortality        | Vaccination | Variant |                                       |
|                                  | ≥60         | No               | No          | Yes     | No                                    |
|                                  | Finer older | No               | No          | Yes     | No                                    |
| Kyrgyzstan                       | 25-49       | Yes              | No          | No      | No                                    |
|                                  | 50-59       | Yes              | No          | No      | No                                    |
|                                  | ≥60         | Yes              | Yes         | No      | No                                    |
|                                  | Finer older | Yes              | No          | No      | No                                    |
|                                  |             |                  |             |         |                                       |
| Latvia                           | 25-49       | Yes              | Yes         | Yes     | Full                                  |
|                                  | 50-59       | Yes              | Yes         | Yes     | Full                                  |
|                                  | ≥60         | Yes              | Yes         | Yes     | Full                                  |
|                                  | Finer older | Yes              | Yes         | Yes     | Full                                  |
| Lithuania                        | 25-49       | Yes <sup>6</sup> | Yes         | Yes     | Full                                  |
|                                  | 50-59       | Yes <sup>6</sup> | Yes         | Yes     | Full                                  |
|                                  | ≥60         | Yes <sup>6</sup> | Yes         | Yes     | Full                                  |
|                                  | Finer older | Yes <sup>6</sup> | Yes         | Yes     | Full                                  |
| Luxembourg                       | 25-49       | Yes              | Yes         | Yes     | Full                                  |
|                                  | 50-59       | Yes              | Yes         | Yes     | Full                                  |
|                                  | ≥60         | Yes              | Yes         | Yes     | Full                                  |
|                                  | Finer older | Yes              | Yes         | Yes     | Full                                  |
| Malta                            | 25-49       | Yes              | Yes         | Yes     | Full                                  |
|                                  | 50-59       | Yes              | Yes         | Yes     | Full                                  |
|                                  | ≥60         | Yes              | Yes         | Yes     | Full                                  |
|                                  | Finer older | Yes              | Yes         | Yes     | Full                                  |
| Montenegro                       | 25-49       | No               | No          | Yes     | Partial                               |
|                                  | 50-59       | No               | No          | Yes     | Partial                               |



| Countries, areas and territories | Age group   | Data type |                  |                  | Included in full or partial analysis? |
|----------------------------------|-------------|-----------|------------------|------------------|---------------------------------------|
|                                  |             | Mortality | Vaccination      | Variant          |                                       |
|                                  | ≥60         | No        | No               | Yes              | Partial                               |
|                                  | Finer older | No        | No               | Yes              | Partial                               |
| Netherlands (Kingdom of the)     | 25-49       | Yes       | Yes <sup>6</sup> | Yes              | Full                                  |
|                                  | 50-59       | Yes       | Yes <sup>6</sup> | Yes              | Full                                  |
|                                  | ≥60         | Yes       | Yes <sup>6</sup> | Yes              | Full                                  |
|                                  | Finer older | Yes       | Yes <sup>6</sup> | Yes              | Full                                  |
|                                  |             |           |                  |                  |                                       |
| North Macedonia                  | 25-49       | Yes       | Yes              | Yes              | Full                                  |
|                                  | 50-59       | Yes       | Yes              | Yes              | Full                                  |
|                                  | ≥60         | Yes       | Yes              | Yes              | Full                                  |
|                                  | Finer older | Yes       | Yes              | Yes              | Full                                  |
| Norway <sup>4</sup>              | 25-49       | No        | No               | Yes              | Partial                               |
|                                  | 50-59       | No        | No               | Yes              | Partial                               |
|                                  | ≥60         | No        | No               | Yes              | Partial                               |
|                                  | Finer older | No        | No               | Yes              | Partial                               |
| Poland                           | 25-49       | No        | No               | Yes              | Partial                               |
|                                  | 50-59       | No        | No               | Yes              | Partial                               |
|                                  | ≥60         | No        | No               | Yes              | Partial                               |
|                                  | Finer older | No        | No               | Yes              | Partial                               |
| Portugal                         | 25-49       | Yes       | Yes              | Yes              | Full                                  |
|                                  | 50-59       | Yes       | Yes              | Yes              | Full                                  |
|                                  | ≥60         | Yes       | Yes              | Yes              | Full                                  |
|                                  | Finer older | Yes       | Yes              | Yes              | Full                                  |
| Republic of Moldova              | 25-49       | Yes       | No               | Yes <sup>1</sup> | No                                    |
|                                  | 50-59       | Yes       | No               | Yes <sup>1</sup> | No                                    |

| Countries, areas and territories | Age group   | Data type        |             |                  | Included in full or partial analysis? |
|----------------------------------|-------------|------------------|-------------|------------------|---------------------------------------|
|                                  |             | Mortality        | Vaccination | Variant          |                                       |
|                                  | ≥60         | Yes              | Yes         | Yes <sup>1</sup> | Full                                  |
|                                  | Finer older | Yes              | No          | Yes <sup>1</sup> | No                                    |
| Romania                          | 25-49       | Yes <sup>6</sup> | Yes         | Yes              | Full                                  |
|                                  | 50-59       | Yes <sup>6</sup> | Yes         | Yes              | Full                                  |
|                                  | ≥60         | Yes <sup>6</sup> | Yes         | Yes              | Full                                  |
|                                  | Finer older | Yes <sup>6</sup> | Yes         | Yes              | Full                                  |
|                                  |             |                  |             |                  |                                       |
| Russian Federation               | 25-49       | No               | No          | No               | No                                    |
|                                  | 50-59       | No               | No          | No               | No                                    |
|                                  | ≥60         | No               | No          | No               | No                                    |
|                                  | Finer older | No               | No          | No               | No                                    |
| Serbia                           | 25-49       | No               | Yes         | No               | No                                    |
|                                  | 50-59       | No               | Yes         | No               | No                                    |
|                                  | ≥60         | No               | Yes         | No               | No                                    |
|                                  | Finer older | No               | Yes         | No               | No                                    |
| Slovakia                         | 25-49       | Yes              | Yes         | Yes              | Full                                  |
|                                  | 50-59       | Yes              | Yes         | Yes              | Full                                  |
|                                  | ≥60         | Yes              | Yes         | Yes              | Full                                  |
|                                  | Finer older | Yes              | Yes         | Yes              | Full                                  |
| Slovenia                         | 25-49       | Yes              | Yes         | Yes              | Full                                  |
|                                  | 50-59       | Yes              | Yes         | Yes              | Full                                  |
|                                  | ≥60         | Yes              | Yes         | Yes              | Full                                  |
|                                  | Finer older | Yes              | Yes         | Yes              | Full                                  |
| Spain                            | 25-49       | Yes              | Yes         | Yes              | Full                                  |
|                                  | 50-59       | Yes              | Yes         | Yes              | Full                                  |

| Countries, areas and territories | Age group   | Data type |             |                  | Included in full or partial analysis? |
|----------------------------------|-------------|-----------|-------------|------------------|---------------------------------------|
|                                  |             | Mortality | Vaccination | Variant          |                                       |
|                                  | ≥60         | Yes       | Yes         | Yes              | Full                                  |
|                                  | Finer older | Yes       | Yes         | Yes              | Full                                  |
| Sweden                           | 25-49       | Yes       | Yes         | Yes              | Full                                  |
|                                  | 50-59       | Yes       | Yes         | Yes              | Full                                  |
|                                  | ≥60         | Yes       | Yes         | Yes              | Full                                  |
|                                  | Finer older | Yes       | Yes         | Yes              | Full                                  |
| Switzerland                      | 25-49       | Yes       | Yes         | Yes <sup>2</sup> | Full                                  |
|                                  | 50-59       | Yes       | Yes         | Yes <sup>2</sup> | Full                                  |
|                                  | ≥60         | Yes       | Yes         | Yes <sup>2</sup> | Full                                  |
|                                  | Finer older | Yes       | Yes         | Yes <sup>2</sup> | Full                                  |
| Tajikistan                       | 25-49       | No        | No          | No               | No                                    |
|                                  | 50-59       | No        | No          | No               | No                                    |
|                                  | ≥60         | No        | No          | No               | No                                    |
|                                  | Finer older | No        | No          | No               | No                                    |
| Turkmenistan                     | 25-49       | No        | No          | No               | No                                    |
|                                  | 50-59       | No        | No          | No               | No                                    |
|                                  | ≥60         | No        | No          | No               | No                                    |
|                                  | Finer older | No        | No          | No               | No                                    |
| Türkiye <sup>5</sup>             | 25-49       | Yes       | No          | Yes              | No                                    |
|                                  | 50-59       | Yes       | No          | Yes              | No                                    |
|                                  | ≥60         | Yes       | No          | Yes              | No                                    |
|                                  | Finer older | Yes       | No          | Yes              | No                                    |
| Ukraine                          | 25-49       | Yes       | No          | Yes              | No                                    |
|                                  | 50-59       | Yes       | No          | Yes              | No                                    |

| Countries, areas and territories  | Age group   | Data type        |                  |                  | Included in full or partial analysis? |
|-----------------------------------|-------------|------------------|------------------|------------------|---------------------------------------|
|                                   |             | Mortality        | Vaccination      | Variant          |                                       |
|                                   | ≥60         | Yes              | Yes <sup>6</sup> | Yes              | Full                                  |
|                                   | Finer older | Yes              | No               | Yes              | No                                    |
| United Kingdom (England)          | 25-49       | Yes              | Yes              | Yes              | Full                                  |
|                                   | 50-59       | Yes              | Yes              | Yes              | Full                                  |
|                                   | ≥60         | Yes              | Yes              | Yes              | Full                                  |
|                                   | Finer older | Yes              | Yes              | Yes              | Full                                  |
|                                   |             |                  |                  |                  |                                       |
| United Kingdom (Northern Ireland) | 25-49       | No               | No               | No               | No                                    |
|                                   | 50-59       | No               | No               | No               | No                                    |
|                                   | ≥60         | No               | No               | No               | No                                    |
|                                   | Finer older | No               | No               | No               | No                                    |
| United Kingdom (Scotland)         | 25-49       | Yes <sup>6</sup> | Yes <sup>6</sup> | Yes              | Full                                  |
|                                   | 50-59       | Yes <sup>6</sup> | Yes <sup>6</sup> | Yes              | Full                                  |
|                                   | ≥60         | Yes <sup>6</sup> | Yes <sup>6</sup> | Yes              | Full                                  |
|                                   | Finer older | No               | Yes              | Yes              | No                                    |
| United Kingdom (Wales)            | 25-49       | No               | No               | Yes              | Partial                               |
|                                   | 50-59       | No               | No               | Yes              | Partial                               |
|                                   | ≥60         | No               | No               | Yes              | Partial                               |
|                                   | Finer older | No               | No               | Yes              | Partial                               |
| Uzbekistan                        | 25-49       | No               | No               | No               | No                                    |
|                                   | 50-59       | No               | No               | No               | No                                    |
|                                   | ≥60         | No               | Yes              | No               | No                                    |
|                                   | Finer older | No               | No               | No               | No                                    |
| Kosovo <sup>[1]</sup>             | 25-49       | Yes <sup>6</sup> | Yes              | Yes <sup>1</sup> | Full                                  |

| Countries, areas and territories | Age group   | Data type        |             |                  | Included in full or partial analysis? |
|----------------------------------|-------------|------------------|-------------|------------------|---------------------------------------|
|                                  |             | Mortality        | Vaccination | Variant          |                                       |
|                                  | 50-59       | Yes <sup>6</sup> | Yes         | Yes <sup>1</sup> | Full                                  |
|                                  | ≥60         | Yes <sup>6</sup> | Yes         | Yes <sup>1</sup> | Full                                  |
|                                  | Finer older | Yes <sup>6</sup> | Yes         | Yes <sup>1</sup> | Full                                  |

1 Calculated as median start and end weeks of neighboring CAT.

2 Data from GISAID.

3 Although Bosnia and Herzegovina is reporting vaccination data, it is not possible to disaggregate by dose for some weeks.

4 Due to a change in reporting system this country could not be included in the full analysis.

5 Cannot be disaggregated by age.

6 Data was completed or updated after data cut.

[1] All references to Kosovo in this document should be understood to be in the context of the United Nations Security Council resolution 1244 (1999).

Supplementary table 2: Age group and countries, areas and territories (CAT) breakdown of vaccination uptake (VU), number of deaths observed and averted as well as observed and expected Mortality Rates (MR), up to week 12/2023 in population aged ≥25 years, for the 34 WHO European Region CAT with sufficient data.

| Countries, areas and territories | Age group (years) | Vaccination Uptake |                 |                 |                 | Deaths   |         | Mortality Rate |          | % change |
|----------------------------------|-------------------|--------------------|-----------------|-----------------|-----------------|----------|---------|----------------|----------|----------|
|                                  |                   | VU <sub>2</sub>    | VU <sub>3</sub> | VU <sub>4</sub> | VU <sub>5</sub> | Reported | Averted | Reported       | Expected |          |
| Austria                          | 25-49             | 72                 | 61              | 12              | 0               | 272      | 197     | 9              | 16       | 42       |
|                                  | 50-59             | 80                 | 74              | 22              | 1               | 687      | 623     | 49             | 94       | 48       |
|                                  | 60-69             | 84                 | 79              | 37              | 1               | 1,837    | 1,829   | 169            | 337      | 50       |
|                                  | 70-79             | 89                 | 85              | 49              | 2               | 3,882    | 4,219   | 523            | 1,092    | 52       |
|                                  | 80+               | 95                 | 86              | 51              | 2               | 10,540   | 16,046  | 2,011          | 5,072    | 60       |
|                                  | 60+               | 88                 | 83              | 44              | 2               | 16,259   | 22,094  | 691            | 1,631    | 58       |
| Belgium                          | 25-49             | 79                 | 66              | 23              | 1               | 98       | 84      | 3              | 5        | 46       |
|                                  | 50-59             | 86                 | 82              | 48              | 3               | 516      | 613     | 33             | 71       | 54       |
|                                  | 60-69             | 92                 | 89              | 65              | 5               | 1,814    | 2,633   | 130            | 320      | 59       |
|                                  | 70-79             | 95                 | 92              | 74              | 8               | 3,749    | 6,217   | 382            | 1,016    | 62       |
|                                  | 80+               | 98                 | 94              | 74              | 41              | 9,744    | 16,850  | 1,505          | 4,107    | 63       |
|                                  | 60+               | 94                 | 91              | 70              | 14              | 15,307   | 25,700  | 507            | 1,358    | 63       |
| Croatia                          | 25-49             | 54                 | 16              | 0               | 0               | 81       | 19      | 7              | 8        | 19       |
|                                  | 50-59             | 68                 | 30              | 1               | 0               | 203      | 144     | 38             | 65       | 41       |
|                                  | 60-69             | 76                 | 47              | 3               | 0               | 716      | 604     | 126            | 233      | 46       |
|                                  | 70-79             | 78                 | 62              | 7               | 2               | 1,369    | 1,243   | 364            | 694      | 48       |
|                                  | 80+               | 66                 | 53              | 7               | 2               | 2,436    | 1,606   | 1,151          | 1,910    | 40       |
|                                  | 60+               | 75                 | 53              | 5               | 1               | 4,521    | 3,453   | 391            | 690      | 43       |
| Cyprus                           | 25-49             | 78                 | 59              | 2               | 0               | 46       | 29      | 13             | 22       | 39       |
|                                  | 50-59             | 82                 | 74              | 6               | 0               | 75       | 94      | 69             | 155      | 56       |
|                                  | 60-69             | 88                 | 82              | 20              | 3               | 211      | 256     | 218            | 483      | 55       |
|                                  | 70-79             | 93                 | 90              | 38              | 10              | 387      | 749     | 561            | 1,647    | 66       |

|                                  |                   | Vaccination Uptake |                 |                 |                 | Deaths   |         | Mortality Rate |          |          |
|----------------------------------|-------------------|--------------------|-----------------|-----------------|-----------------|----------|---------|----------------|----------|----------|
| Countries, areas and territories | Age group (years) | VU <sub>2</sub>    | VU <sub>3</sub> | VU <sub>4</sub> | VU <sub>5</sub> | Reported | Averted | Reported       | Expected | % change |
|                                  |                   |                    | 80+             | 91              | 84              | 38       | 11      | 771            | 1,530    |          |
|                                  | 60+               | 90                 | 85              | 29              | 7               | 1,369    | 2,535   | 680            | 1,939    | 65       |
| Czechia                          | 25-49             | 64                 | 37              | 2               | 0               | 623      | 220     | 17             | 23       | 26       |
|                                  | 50-59             | 72                 | 54              | 6               | 0               | 1,398    | 640     | 102            | 149      | 31       |
|                                  | 60-69             | 79                 | 69              | 16              | 0               | 4,888    | 2,339   | 388            | 574      | 32       |
|                                  | 70-79             | 86                 | 77              | 27              | 0               | 11,788   | 7,934   | 1,114          | 1,864    | 40       |
|                                  | 80+               | 87                 | 75              | 30              | 0               | 14,595   | 13,530  | 3,235          | 6,234    | 48       |
|                                  | 60+               | 83                 | 73              | 23              | 0               | 31,271   | 23,803  | 1,129          | 1,989    | 43       |
|                                  |                   |                    |                 |                 |                 |          |         |                |          |          |
| Denmark                          | 25-49             | 84                 | 63              | 5               | 0               | 130      | 154     | 7              | 15       | 54       |
|                                  | 50-59             | 93                 | 87              | 58              | 1               | 217      | 409     | 27             | 78       | 65       |
|                                  | 60-69             | 97                 | 94              | 79              | 1               | 656      | 1,437   | 97             | 311      | 69       |
|                                  | 70-79             | 98                 | 97              | 89              | 3               | 1,823    | 3,982   | 314            | 999      | 69       |
|                                  | 80+               | 100                | 100             | 96              | 3               | 4,293    | 9,218   | 1,473          | 4,635    | 68       |
|                                  | 60+               | 99                 | 97              | 86              | 2               | 6,772    | 14,637  | 540            | 1,706    | 68       |
| Estonia                          | 25-49             | 57                 | 34              | 5               | 0               | 59       | 18      | 13             | 17       | 23       |
|                                  | 50-59             | 67                 | 46              | 8               | 0               | 107      | 52      | 61             | 91       | 33       |
|                                  | 60-69             | 72                 | 54              | 15              | 1               | 330      | 191     | 196            | 310      | 37       |
|                                  | 70-79             | 80                 | 65              | 22              | 1               | 633      | 555     | 546            | 1,026    | 47       |
|                                  | 80+               | 82                 | 64              | 23              | 1               | 1,504    | 1,670   | 1,876          | 3,958    | 53       |
|                                  | 60+               | 77                 | 60              | 19              | 1               | 2,467    | 2,416   | 677            | 1,341    | 49       |
| Finland                          | 25-49             | 83                 | 52              | 3               | 0               | 157      | 201     | 9              | 20       | 56       |
|                                  | 50-59             | 92                 | 77              | 11              | 2               | 226      | 382     | 32             | 86       | 63       |
|                                  | 60-69             | 94                 | 87              | 54              | 15              | 647      | 1,327   | 91             | 278      | 67       |
|                                  | 70-79             | 96                 | 92              | 79              | 41              | 1,895    | 4,287   | 319            | 1,040    | 69       |

|                                  |                   | Vaccination Uptake |                 |                 |                 | Deaths   |         | Mortality Rate |          |          |
|----------------------------------|-------------------|--------------------|-----------------|-----------------|-----------------|----------|---------|----------------|----------|----------|
| Countries, areas and territories | Age group (years) | VU <sub>2</sub>    | VU <sub>3</sub> | VU <sub>4</sub> | VU <sub>5</sub> | Reported | Averted | Reported       | Expected | % change |
|                                  |                   |                    | 80+             | 92              | 91              | 81       | 49      | 5,583          | 11,342   |          |
|                                  | 60+               | 94                 | 89              | 68              | 32              | 8,125    | 16,956  | 497            | 1,535    | 68       |
| France                           | 25-49             | 89                 | 68              | 4               | 0               | 1,730    | 2,106   | 8              | 19       | 55       |
|                                  | 50-59             | 91                 | 80              | 13              | 1               | 3,998    | 4,935   | 45             | 100      | 55       |
|                                  | 60-69             | 91                 | 84              | 38              | 8               | 11,431   | 13,424  | 141            | 307      | 54       |
|                                  | 70-79             | 90                 | 85              | 49              | 13              | 22,785   | 27,648  | 366            | 809      | 55       |
|                                  | 80+               | 88                 | 80              | 49              | 16              | 58,884   | 63,554  | 1,441          | 2,997    | 52       |
|                                  | 60+               | 90                 | 83              | 44              | 11              | 93,100   | 104,626 | 506            | 1,074    | 53       |
|                                  | Germany           | 60+                | 90              | 85              | 39              | 8        | 135,420 | 154,457        | 554      | 1,187    |
| Greece                           | 25-49             | 70                 | 60              | 2               | 0               | 843      | 669     | 25             | 45       | 44       |
|                                  | 50-59             | 77                 | 70              | 7               | 1               | 1,939    | 1,725   | 126            | 237      | 47       |
|                                  | 60-69             | 86                 | 78              | 21              | 4               | 4,613    | 5,302   | 349            | 750      | 53       |
|                                  | 70-79             | 91                 | 84              | 33              | 8               | 7,969    | 10,636  | 802            | 1,872    | 57       |
|                                  | 80+               | 87                 | 77              | 30              | 7               | 18,081   | 25,629  | 2,398          | 5,796    | 59       |
|                                  | 60+               | 88                 | 80              | 27              | 6               | 30,663   | 41,567  | 999            | 2,353    | 58       |
| Hungary                          | 25-49             | 63                 | 36              | 1               | 0               | 1,798    | 845     | 52             | 77       | 32       |
|                                  | 50-59             | 70                 | 50              | 3               | 0               | 3,423    | 1,930   | 270            | 422      | 36       |
|                                  | 60-69             | 81                 | 65              | 9               | 0               | 8,408    | 6,352   | 678            | 1,190    | 43       |
|                                  | 70-79             | 84                 | 74              | 17              | 1               | 12,262   | 11,039  | 1,385          | 2,632    | 47       |
|                                  | 80+               | 75                 | 64              | 15              | 1               | 15,337   | 10,857  | 3,444          | 5,882    | 41       |
|                                  | 60+               | 81                 | 68              | 13              | 0               | 36,007   | 28,248  | 1,401          | 2,500    | 44       |



|                                  |                   | Vaccination Uptake |                 |                 |                 | Deaths   |         | Mortality Rate |          |          |
|----------------------------------|-------------------|--------------------|-----------------|-----------------|-----------------|----------|---------|----------------|----------|----------|
| Countries, areas and territories | Age group (years) | VU <sub>2</sub>    | VU <sub>3</sub> | VU <sub>4</sub> | VU <sub>5</sub> | Reported | Averted | Reported       | Expected | % change |
|                                  |                   | Iceland            | 25-49           | 57              | 81              | 4        | 0       | 1              | 3        |          |
| 50-59                            | 84                |                    | 90              | 13              | 1               | 6        | 10      | 14             | 36       | 62       |
| 60-69                            | 93                |                    | 91              | 58              | 13              | 13       | 25      | 33             | 98       | 66       |
| 70-79                            | 97                |                    | 94              | 76              | 28              | 56       | 134     | 221            | 751      | 71       |
| 80+                              | 100               |                    | 94              | 84              | 32              | 159      | 340     | 1,215          | 3,812    | 68       |
| 60+                              | 96                |                    | 93              | 68              | 21              | 228      | 499     | 295            | 940      | 69       |
| Ireland                          | 25-49             | 85                 | 65              | 12              | 0               | 143      | 153     | 8              | 17       | 52       |
|                                  | 50-59             | 87                 | 87              | 39              | 2               | 239      | 446     | 38             | 109      | 65       |
|                                  | 60-69             | 95                 | 91              | 60              | 19              | 638      | 1,070   | 127            | 339      | 63       |
|                                  | 70-79             | 100                | 100             | 87              | 55              | 1,448    | 2,570   | 418            | 1,161    | 64       |
|                                  | 80+               | 100                | 100             | 95              | 60              | 3,534    | 4,319   | 1,943          | 4,317    | 55       |
|                                  | 60+               | 100                | 100             | 76              | 38              | 5,620    | 7,959   | 545            | 1,317    | 59       |
| Israel                           | 25-49             | 89                 | 66              | 4               | 0               | 270      | 386     | 10             | 24       | 59       |
|                                  | 50-59             | 95                 | 81              | 10              | 0               | 458      | 1,004   | 58             | 184      | 69       |
|                                  | 60+               | 100                | 100             | 57              | 1               | 8,669    | 24,857  | 667            | 2,579    | 74       |
| Italy                            | 25-49             | 85                 | 81              | 3               | 0               | 1,801    | 1,692   | 10             | 19       | 48       |
|                                  | 50-59             | 85                 | 87              | 6               | 0               | 4,795    | 4,464   | 50             | 97       | 48       |
|                                  | 60-69             | 85                 | 91              | 21              | 1               | 12,880   | 12,023  | 170            | 329      | 48       |
|                                  | 70-79             | 90                 | 93              | 33              | 2               | 30,768   | 32,432  | 511            | 1,050    | 51       |
|                                  | 80+               | 96                 | 93              | 46              | 6               | 81,339   | 121,265 | 1,805          | 4,497    | 60       |
|                                  | 60+               | 90                 | 92              | 31              | 3               | 124,987  | 165,720 | 690            | 1,606    | 57       |
| Latvia                           | 25-49             | 61                 | 32              | 2               | 0               | 222      | 166     | 36             | 63       | 43       |
|                                  | 50-59             | 62                 | 36              | 3               | 0               | 415      | 294     | 161            | 275      | 41       |
|                                  | 60-69             | 65                 | 42              | 6               | 1               | 936      | 709     | 379            | 666      | 43       |

|                                  |                   | Vaccination Uptake |                 |                 |                 | Deaths   |         | Mortality Rate |          |          |
|----------------------------------|-------------------|--------------------|-----------------|-----------------|-----------------|----------|---------|----------------|----------|----------|
| Countries, areas and territories | Age group (years) | VU <sub>2</sub>    | VU <sub>3</sub> | VU <sub>4</sub> | VU <sub>5</sub> | Reported | Averted | Reported       | Expected | % change |
|                                  |                   |                    |                 |                 |                 |          |         |                |          |          |
|                                  | 70-79             | 67                 | 48              | 11              | 3               | 1,481    | 1,094   | 892            | 1,551    | 42       |
|                                  | 80+               | 54                 | 39              | 10              | 3               | 2,605    | 1,358   | 2,298          | 3,496    | 34       |
|                                  | 60+               | 63                 | 43              | 9               | 2               | 5,022    | 3,161   | 954            | 1,554    | 39       |
| Lithuania                        | 25-49             | 63                 | 32              | 1               | 0               | 291      | 269     | 32             | 61       | 48       |
|                                  | 50-59             | 67                 | 37              | 1               | 0               | 512      | 429     | 122            | 225      | 46       |
|                                  | 60-69             | 72                 | 47              | 2               | 0               | 1,155    | 1,069   | 304            | 586      | 48       |
|                                  | 70-79             | 75                 | 57              | 4               | 0               | 2,167    | 2,057   | 900            | 1,754    | 49       |
|                                  | 80+               | 64                 | 49              | 5               | 0               | 4,070    | 2,465   | 2,575          | 4,135    | 38       |
|                                  | 60+               | 71                 | 51              | 3               | 0               | 7,392    | 5,591   | 949            | 1,667    | 43       |
| Luxembourg                       | 25-49             | 68                 | 59              | 3               | 0               | 13       | 0       | 5              | 5        | 0        |
|                                  | 50-59             | 74                 | 74              | 7               | 0               | 35       | 31      | 38             | 72       | 47       |
|                                  | 60-69             | 80                 | 80              | 39              | 1               | 85       | 79      | 129            | 248      | 48       |
|                                  | 70-79             | 87                 | 84              | 53              | 0               | 148      | 145     | 365            | 723      | 49       |
|                                  | 80+               | 97                 | 90              | 63              | 1               | 473      | 809     | 1,862          | 5,046    | 63       |
|                                  | 60+               | 86                 | 83              | 48              | 1               | 706      | 1,033   | 535            | 1,318    | 59       |
| Malta                            | 25-49             | 82                 | 78              | 1               | 0               | 14       | 30      | 7              | 21       | 68       |
|                                  | 50-59             | 86                 | 89              | 4               | 0               | 10       | 18      | 17             | 48       | 64       |
|                                  | 60-69             | 93                 | 95              | 26              | 3               | 68       | 153     | 114            | 370      | 69       |
|                                  | 70-79             | 98                 | 80              | 50              | 6               | 138      | 311     | 289            | 941      | 69       |
|                                  | 80+               | 100                | 83              | 82              | 9               | 274      | 635     | 1,276          | 4,234    | 70       |
|                                  | 60+               | 97                 | 87              | 44              | 5               | 480      | 1,099   | 372            | 1,225    | 70       |
| Netherlands                      | 25-49             | 63                 | 50              | 9               | 0               | 137      | 73      | 2              | 4        | 35       |
|                                  | 50-59             | 70                 | 70              | 23              | 1               | 352      | 273     | 14             | 25       | 44       |
|                                  | 60-69             | 89                 | 87              | 57              | 29              | 1,091    | 1,281   | 50             | 109      | 54       |

|                                  |                   | Vaccination Uptake |                 |                 |                 | Deaths   |         | Mortality Rate |          |          |
|----------------------------------|-------------------|--------------------|-----------------|-----------------|-----------------|----------|---------|----------------|----------|----------|
| Countries, areas and territories | Age group (years) | VU <sub>2</sub>    | VU <sub>3</sub> | VU <sub>4</sub> | VU <sub>5</sub> | Reported | Averted | Reported       | Expected | % change |
|                                  |                   |                    | 70-79           | 97              | 96              | 80       | 59      | 3,150          | 4,211    |          |
|                                  | 80+               | 100                | 100             | 86              | 65              | 8,260    | 11,417  | 968            | 2,307    | 58       |
|                                  | 60+               | 94                 | 93              | 70              | 46              | 12,501   | 16,909  | 267            | 628      | 57       |
| North Macedonia                  | 25-49             | 51                 | 5               | 0               | 0               | 396      | 92      | 64             | 79       | 19       |
|                                  | 50-59             | 61                 | 10              | 0               | 0               | 714      | 219     | 282            | 368      | 23       |
|                                  | 60-69             | 68                 | 23              | 1               | 0               | 1,947    | 831     | 815            | 1,162    | 30       |
|                                  | 70-79             | 69                 | 29              | 3               | 0               | 2,647    | 1,373   | 1,825          | 2,771    | 34       |
|                                  | 80+               | 51                 | 18              | 2               | 0               | 1,888    | 706     | 3,366          | 4,625    | 27       |
|                                  | 60+               | 66                 | 24              | 2               | 0               | 6,482    | 2,910   | 2,712          | 3,930    | 31       |
| Portugal                         | 25-49             | 76                 | 70              | 7               | 0               | 297      | 355     | 9              | 20       | 54       |
|                                  | 50-59             | 78                 | 88              | 43              | 0               | 611      | 802     | 41             | 94       | 57       |
|                                  | 60-69             | 87                 | 92              | 61              | 1               | 1,826    | 2,139   | 132            | 286      | 54       |
|                                  | 70-79             | 90                 | 92              | 74              | 1               | 4,467    | 5,304   | 407            | 890      | 54       |
|                                  | 80+               | 90                 | 93              | 82              | 51              | 14,146   | 18,444  | 1,953          | 4,500    | 57       |
|                                  | 60+               | 89                 | 92              | 70              | 12              | 20,439   | 25,887  | 638            | 1,445    | 56       |
| Republic of Moldova              | 60+               | 39                 | 22              | 2               | 0               | 5,983    | 1,671   | 844            | 1,080    | 22       |
| Romania                          | 25-49             | 37                 | 10              | 0               | 0               | 2,283    | 618     | 36             | 46       | 21       |
|                                  | 50-59             | 40                 | 13              | 0               | 0               | 4,344    | 1,350   | 162            | 213      | 24       |
|                                  | 60-69             | 45                 | 15              | 0               | 0               | 12,296   | 3,923   | 496            | 655      | 24       |
|                                  | 70-79             | 41                 | 14              | 0               | 0               | 17,028   | 4,638   | 1,065          | 1,355    | 21       |
|                                  | 80+               | 26                 | 9               | 0               | 0               | 15,193   | 2,099   | 1,794          | 2,042    | 12       |
|                                  | 60+               | 40                 | 14              | 0               | 0               | 44,517   | 10,660  | 904            | 1,121    | 19       |

|                                  |                   | Vaccination Uptake |                 |                 |                 | Deaths   |         | Mortality Rate |          |          |
|----------------------------------|-------------------|--------------------|-----------------|-----------------|-----------------|----------|---------|----------------|----------|----------|
| Countries, areas and territories | Age group (years) | VU <sub>2</sub>    | VU <sub>3</sub> | VU <sub>4</sub> | VU <sub>5</sub> | Reported | Averted | Reported       | Expected | % change |
|                                  |                   |                    |                 |                 |                 |          |         |                |          |          |
| 50-59                            | 59                | 38                 | 2               | 0               | 1,365           | 469      | 194     | 261            | 26       |          |
| 60-69                            | 69                | 59                 | 3               | 0               | 4,073           | 1,672    | 593     | 837            | 29       |          |
| 70-79                            | 71                | 64                 | 5               | 0               | 5,787           | 2,779    | 1,368   | 2,026          | 32       |          |
| 80+                              | 59                | 53                 | 5               | 0               | 5,884           | 2,082    | 3,204   | 4,337          | 26       |          |
| 60+                              | 68                | 59                 | 4               | 0               | 15,744          | 6,533    | 1,218   | 1,723          | 29       |          |
| Slovenia                         | 25-49             | 47                 | 23              | 1               | 0               | 96       | 26      | 14             | 17       | 21       |
|                                  | 50-59             | 63                 | 40              | 2               | 0               | 243      | 153     | 81             | 132      | 39       |
|                                  | 60-69             | 72                 | 54              | 7               | 1               | 830      | 658     | 294            | 528      | 44       |
|                                  | 70-79             | 78                 | 64              | 13              | 4               | 1,582    | 1,426   | 838            | 1,593    | 47       |
|                                  | 80+               | 69                 | 56              | 16              | 4               | 4,501    | 2,990   | 3,829          | 6,373    | 40       |
|                                  | 60+               | 73                 | 58              | 11              | 3               | 6,913    | 5,074   | 1,175          | 2,038    | 42       |
| Spain                            | 25-49             | 75                 | 52              | 5               | 0               | 1,160    | 1,056   | 7              | 14       | 48       |
|                                  | 50-59             | 79                 | 76              | 13              | 0               | 2,771    | 3,406   | 38             | 85       | 55       |
|                                  | 60-69             | 86                 | 89              | 47              | 0               | 7,324    | 9,579   | 130            | 299      | 57       |
|                                  | 70-79             | 93                 | 92              | 67              | 0               | 14,632   | 23,076  | 358            | 922      | 61       |
|                                  | 80+               | 100                | 93              | 76              | 0               | 44,371   | 87,081  | 1,539          | 4,559    | 66       |
|                                  | 60+               | 92                 | 91              | 60              | 0               | 66,327   | 119,736 | 526            | 1,474    | 64       |
| Sweden                           | 25-49             | 81                 | 53              | 12              | 0               | 208      | 117     | 6              | 9        | 36       |
|                                  | 50-59             | 89                 | 75              | 31              | 1               | 392      | 333     | 29             | 54       | 46       |
|                                  | 60-69             | 91                 | 85              | 63              | 3               | 1,123    | 1,234   | 100            | 211      | 52       |
|                                  | 70-79             | 93                 | 90              | 82              | 4               | 3,783    | 5,082   | 370            | 867      | 57       |
|                                  | 80+               | 83                 | 82              | 77              | 2               | 10,603   | 10,446  | 1,821          | 3,615    | 50       |
|                                  | 60+               | 90                 | 86              | 73              | 3               | 15,509   | 16,762  | 570            | 1,185    | 52       |

|                                  |                   | Vaccination Uptake |                 |                 |                 | Deaths   |         | Mortality Rate |          |          |
|----------------------------------|-------------------|--------------------|-----------------|-----------------|-----------------|----------|---------|----------------|----------|----------|
| Countries, areas and territories | Age group (years) | VU <sub>2</sub>    | VU <sub>3</sub> | VU <sub>4</sub> | VU <sub>5</sub> | Reported | Averted | Reported       | Expected | % change |
| Switzerland                      | 25-49             | 69                 | 47              | 2               | 0               | 91       | 46      | 3              | 5        | 34       |
|                                  | 50-59             | 76                 | 67              | 6               | 0               | 265      | 184     | 20             | 35       | 41       |
|                                  | 60-69             | 81                 | 90              | 13              | 1               | 707      | 550     | 71             | 127      | 44       |
|                                  | 70-79             | 88                 | 100             | 29              | 7               | 1,744    | 1,627   | 234            | 453      | 48       |
|                                  | 80+               | 90                 | 100             | 38              | 10              | 5,874    | 5,847   | 1,245          | 2,483    | 50       |
|                                  | 60+               | 85                 | 100             | 24              | 5               | 8,325    | 8,024   | 377            | 741      | 49       |
| Ukraine                          | 60+               | 38                 | 55              | 27              | 0               | 82,115   | 13,670  | 897            | 1,046    | 14       |
| United Kingdom (England)         | 25-49             | 83                 | 61              | 6               | 0               | 5,239    | 5,573   | 28             | 58       | 52       |
|                                  | 50-59             | 93                 | 82              | 51              | 0               | 9,011    | 13,287  | 117            | 289      | 60       |
|                                  | 60-69             | 100                | 94              | 74              | 0               | 18,739   | 36,958  | 309            | 919      | 66       |
|                                  | 70-79             | 99                 | 97              | 34              | 86              | 39,577   | 81,183  | 812            | 2,477    | 67       |
|                                  | 80+               | 100                | 99              | 86              | 88              | 102,234  | 220,989 | 3,630          | 11,476   | 68       |
|                                  | 60+               | 100                | 96              | 62              | 48              | 160,550  | 339,130 | 1,168          | 3,634    | 68       |
| United Kingdom (Scotland)        | 25-49             | 82                 | 66              | 14              | 1               | 307      | 397     | 17             | 39       | 56       |
|                                  | 50-59             | 95                 | 88              | 57              | 3               | 561      | 1,083   | 71             | 208      | 66       |
|                                  | 60+               | 100                | 100             | 91              | 33              | 9,659    | 20,658  | 673            | 2,113    | 68       |
| Kosovo <sup>(1)</sup>            | 25-49             | 59                 | 5               | 0               | 0               | 85       | 8       | 14             | 15       | 9        |
|                                  | 50-59             | 69                 | 10              | 0               | 0               | 182      | 31      | 93             | 108      | 15       |
|                                  | 60-69             | 74                 | 19              | 1               | 0               | 401      | 99      | 287            | 358      | 20       |
|                                  | 70-79             | 75                 | 25              | 1               | 0               | 607      | 211     | 807            | 1,087    | 26       |
|                                  | 80+               | 50                 | 14              | 1               | 0               | 424      | 83      | 1,209          | 1,445    | 16       |
|                                  | 60+               | 71                 | 20              | 1               | 0               | 1,432    | 393     | 573            | 730      | 22       |

|                                  |                   | Vaccination Uptake |                 |                 |                 | Deaths    |           | Mortality Rate |          |          |
|----------------------------------|-------------------|--------------------|-----------------|-----------------|-----------------|-----------|-----------|----------------|----------|----------|
| Countries, areas and territories | Age group (years) | VU <sub>2</sub>    | VU <sub>3</sub> | VU <sub>4</sub> | VU <sub>5</sub> | Reported  | Averted   | Reported       | Expected | % change |
|                                  |                   | Total              | 25-49           | 76              | 57              | 5         | 0         | 19,550         | 15,774   |          |
| 50-59                            | 82                |                    | 73              | 19              | 1               | 40,070    | 39,833    | 5,064          | 10,099   | 50       |
| 60-69                            | 86                |                    | 81              | 38              | 4               | 101,683   | 109,746   | 1,679          | 3,490    | 52       |
| 70-79                            | 89                |                    | 86              | 45              | 19              | 199,752   | 248,162   | 4,097          | 9,188    | 55       |
| 80+                              | 91                |                    | 86              | 57              | 22              | 447,600   | 665,207   | 15,892         | 39,511   | 60       |
| 60+                              | 85                |                    | 82              | 43              | 11              | 1,232,727 | 1,453,741 | 875            | 1,908    | 54       |

Mortality rates are per 100,000 population.

<sup>[1]</sup> All references to Kosovo in this document should be understood to be in the context of the United Nations Security Council resolution 1244 (1999).

Supplementary table 3: Age group and countries, areas and territories (CAT) breakdown of vaccination uptake (VU), number of deaths reported and averted as well as reported and expected Mortality Rates (MR) per Variant of Concern, up to week 12/2023 in population aged 25 years and over, for the 34 European Region CAT with sufficient data. Note: the overall total does not include the five CAT that could only be included in the pre-Omicron period, namely: Albania, Montenegro, Norway, Poland and United Kingdom (Wales).

|                                  |                   | Alpha        |         |                 |          |          | Delta        |         |                 |          |          | Omicron      |         |                 |          |          |
|----------------------------------|-------------------|--------------|---------|-----------------|----------|----------|--------------|---------|-----------------|----------|----------|--------------|---------|-----------------|----------|----------|
|                                  |                   | Total deaths |         | Mortality rates |          |          | Total deaths |         | Mortality rates |          |          | Total deaths |         | Mortality rates |          |          |
| Countries, areas and territories | Age group (years) | Reported     | Averted | Reported        | Expected | % change | Reported     | Averted | Reported        | Expected | % change | Reported     | Averted | Reported        | Expected | % change |
|                                  |                   | Albania      | 25-49   | 11              | 0        | 1        | 1            | 0       | 43              | 3        | 4        | 5            | 7       |                 |          |          |
| 50-59                            | 36                |              | 0       | 9               | 9        | 0        | 95           | 42      | 25              | 35       | 31       |              |         |                 |          |          |
| 60+                              | 1,029             |              | 36      | 84              | 87       | 3        | 1,866        | 3,510   | 153             | 441      | 65       |              |         |                 |          |          |
| 60-69                            | 121               |              | 0       | 37              | 37       | 0        | 209          | 258     | 63              | 141      | 55       |              |         |                 |          |          |
| 70-79                            | 164               |              | 12      | 84              | 90       | 7        | 263          | 823     | 135             | 558      | 76       |              |         |                 |          |          |
| 80+                              | 58                |              | 0       | 68              | 68       | 0        | 150          | 89      | 177             | 282      | 37       |              |         |                 |          |          |
| Austria                          | 25-49             | 72           | 0       | 2               | 2        | 0        | 95           | 102     | 3               | 7        | 52       | 84           | 101     | 3               | 6        | 55       |
|                                  | 50-59             | 219          | 18      | 16              | 17       | 8        | 208          | 315     | 15              | 37       | 60       | 195          | 325     | 14              | 37       | 62       |
|                                  | 60+               | 4,905        | 1,027   | 213             | 258      | 17       | 3,397        | 9,257   | 147             | 549      | 73       | 5,358        | 13,714  | 228             | 811      | 72       |
|                                  | 60-69             | 591          | 46      | 56              | 61       | 7        | 473          | 855     | 45              | 127      | 64       | 546          | 1,049   | 50              | 147      | 66       |
|                                  | 70-79             | 1,240        | 118     | 165             | 180      | 9        | 911          | 1,708   | 121             | 348      | 65       | 1,171        | 2,702   | 158             | 522      | 70       |
|                                  | 80+               | 3,074        | 863     | 612             | 784      | 22       | 2,013        | 6,694   | 401             | 1,734    | 77       | 3,641        | 9,963   | 695             | 2,595    | 73       |

|                                        |                      | Alpha        |         |                 |          |          | Delta        |         |                 |          |          | Omicron      |         |                 |          |          |
|----------------------------------------|----------------------|--------------|---------|-----------------|----------|----------|--------------|---------|-----------------|----------|----------|--------------|---------|-----------------|----------|----------|
|                                        |                      | Total deaths |         | Mortality rates |          |          | Total deaths |         | Mortality rates |          |          | Total deaths |         | Mortality rates |          |          |
| Countries,<br>areas and<br>territories | Age group<br>(years) | Reported     | Averted | Reported        | Expected | % change | Reported     | Averted | Reported        | Expected | % change | Reported     | Averted | Reported        | Expected | % change |
|                                        |                      | Belgium      | 25-49   | 6               | 0        | 0        | 0            | 0       | 31              | 68       | 1        | 3            | 69      | 21              | 26       | 1        |
| 50-59                                  | 27                   |              | 3       | 2               | 2        | 10       | 125          | 344     | 8               | 29       | 73       | 158          | 313     | 10              | 30       | 66       |
| 60+                                    | 369                  |              | 541     | 12              | 31       | 59       | 2,735        | 11,052  | 92              | 465      | 80       | 5,362        | 16,856  | 178             | 736      | 76       |
| 60-69                                  | 84                   |              | 32      | 6               | 8        | 28       | 432          | 1,283   | 32              | 125      | 75       | 613          | 1,558   | 44              | 156      | 72       |
| 70-79                                  | 120                  |              | 148     | 13              | 28       | 55       | 831          | 2,879   | 88              | 391      | 78       | 1,266        | 3,779   | 129             | 514      | 75       |
| 80+                                    | 165                  |              | 361     | 25              | 81       | 69       | 1,472        | 6,890   | 227             | 1,291    | 82       | 3,483        | 11,519  | 538             | 2,317    | 77       |
| Croatia                                | 25-49                | 14           | 0       | 1               | 1        | 0        | 14           | 5       | 1               | 2        | 26       | 33           | 16      | 3               | 4        | 33       |
|                                        | 50-59                | 20           | 0       | 4               | 4        | 0        | 37           | 39      | 7               | 14       | 51       | 107          | 111     | 20              | 41       | 51       |
|                                        | 60+                  | 621          | 127     | 54              | 65       | 17       | 655          | 780     | 57              | 124      | 54       | 2,331        | 2,732   | 202             | 438      | 54       |
|                                        | 60-69                | 113          | 12      | 20              | 22       | 10       | 117          | 166     | 21              | 50       | 59       | 354          | 463     | 62              | 144      | 57       |
|                                        | 70-79                | 197          | 43      | 53              | 65       | 18       | 208          | 319     | 55              | 140      | 61       | 671          | 958     | 178             | 433      | 59       |
|                                        | 80+                  | 311          | 72      | 139             | 171      | 19       | 330          | 295     | 156             | 295      | 47       | 1,306        | 1,311   | 617             | 1,237    | 50       |
| Cyprus                                 | 25-49                | 13           | 0       | 4               | 4        | 0        | 20           | 22      | 6               | 13       | 52       | 12           | 7       | 4               | 6        | 37       |
|                                        | 50-59                | 13           | 0       | 12              | 12       | 0        | 26           | 45      | 24              | 65       | 63       | 34           | 55      | 31              | 82       | 62       |
|                                        | 60+                  | 209          | 201     | 105             | 207      | 49       | 268          | 894     | 135             | 586      | 77       | 691          | 1,634   | 343             | 1,155    | 70       |



|                                        |                      | Alpha        |         |                 |          |          | Delta        |         |                 |          |          | Omicron      |         |                 |          |          |
|----------------------------------------|----------------------|--------------|---------|-----------------|----------|----------|--------------|---------|-----------------|----------|----------|--------------|---------|-----------------|----------|----------|
|                                        |                      | Total deaths |         | Mortality rates |          |          | Total deaths |         | Mortality rates |          |          | Total deaths |         | Mortality rates |          |          |
| Countries,<br>areas and<br>territories | Age group<br>(years) | Reported     | Averted | Reported        | Expected | % change | Reported     | Averted | Reported        | Expected | % change | Reported     | Averted | Reported        | Expected | % change |
|                                        |                      |              | 60-69   | 56              | 9        | 59       | 68           | 14      | 50              | 117      | 52       | 175          | 70      | 77              | 147      | 80       |
|                                        | 70-79                | 62           | 39      | 91              | 149      | 39       | 89           | 323     | 131             | 607      | 78       | 184          | 444     | 267             | 910      | 71       |
|                                        | 80+                  | 91           | 153     | 263             | 706      | 63       | 129          | 454     | 373             | 1,687    | 78       | 430          | 1,043   | 1,208           | 4,137    | 71       |
| Czechia                                | 25-49                | 307          | 4       | 8               | 8        | 1        | 136          | 140     | 4               | 7        | 51       | 102          | 84      | 3               | 5        | 45       |
|                                        | 50-59                | 740          | 17      | 55              | 56       | 2        | 286          | 417     | 21              | 52       | 59       | 214          | 240     | 16              | 33       | 53       |
|                                        | 60+                  | 14,540       | 1,868   | 524             | 592      | 11       | 5,526        | 11,763  | 199             | 623      | 68       | 5,826        | 11,822  | 210             | 637      | 67       |
|                                        | 60-69                | 2,669        | 68      | 206             | 212      | 2        | 892          | 1,370   | 69              | 175      | 61       | 644          | 1,050   | 51              | 135      | 62       |
|                                        | 70-79                | 5,995        | 335     | 579             | 611      | 5        | 2,049        | 4,346   | 198             | 617      | 68       | 1,862        | 3,809   | 176             | 536      | 67       |
|                                        | 80+                  | 5,876        | 1,465   | 1,321           | 1,650    | 20       | 2,585        | 6,047   | 581             | 1,940    | 70       | 3,320        | 6,963   | 736             | 2,279    | 68       |
| Denmark                                | 25-49                | 2            | 0       | 0               | 0        | 0        | 24           | 35      | 1               | 3        | 59       | 89           | 128     | 5               | 12       | 59       |
|                                        | 50-59                | 2            | 0       | 0               | 0        | 0        | 31           | 110     | 4               | 18       | 78       | 148          | 333     | 18              | 60       | 69       |
|                                        | 60+                  | 17           | 50      | 1               | 4        | 75       | 558          | 1,837   | 37              | 157      | 77       | 4,711        | 14,273  | 375             | 1,513    | 75       |
|                                        | 60-69                | 3            | 0       | 0               | 0        | 0        | 59           | 272     | 9               | 50       | 82       | 466          | 1,323   | 69              | 265      | 74       |
|                                        | 70-79                | 8            | 9       | 1               | 3        | 53       | 148          | 513     | 26              | 115      | 78       | 1,265        | 3,878   | 218             | 885      | 75       |
|                                        | 80+                  | 6            | 41      | 2               | 17       | 87       | 351          | 1,052   | 124             | 497      | 75       | 2,980        | 9,072   | 1,022           | 4,135    | 75       |

|                                        |                      | Alpha        |         |                 |          |          | Delta        |         |                 |          |          | Omicron      |         |                 |          |          |
|----------------------------------------|----------------------|--------------|---------|-----------------|----------|----------|--------------|---------|-----------------|----------|----------|--------------|---------|-----------------|----------|----------|
|                                        |                      | Total deaths |         | Mortality rates |          |          | Total deaths |         | Mortality rates |          |          | Total deaths |         | Mortality rates |          |          |
| Countries,<br>areas and<br>territories | Age group<br>(years) | Reported     | Averted | Reported        | Expected | % change | Reported     | Averted | Reported        | Expected | % change | Reported     | Averted | Reported        | Expected | % change |
|                                        |                      | Estonia      | 25-49   | 15              | 0        | 3        | 3            | 0       | 16              | 11       | 3        | 6            | 41      | 24              | 8        | 5        |
| 50-59                                  | 34                   |              | 0       | 20              | 20       | 0        | 28           | 30      | 16              | 34       | 52       | 37           | 25      | 21              | 35       | 40       |
| 60+                                    | 675                  |              | 127     | 189             | 225      | 16       | 495          | 872     | 139             | 383      | 64       | 978          | 1,556   | 268             | 696      | 61       |
| 60-69                                  | 113                  |              | 8       | 69              | 73       | 7        | 67           | 91      | 41              | 96       | 58       | 106          | 107     | 63              | 127      | 50       |
| 70-79                                  | 212                  |              | 29      | 188             | 214      | 12       | 132          | 223     | 117             | 315      | 63       | 213          | 329     | 184             | 468      | 61       |
| 80+                                    | 350                  |              | 90      | 443             | 557      | 20       | 296          | 558     | 375             | 1,081    | 65       | 659          | 1,120   | 822             | 2,219    | 63       |
| Finland                                | 25-49                | 8            | 0       | 0               | 0        | 0        | 22           | 35      | 1               | 3        | 61       | 122          | 179     | 7               | 17       | 59       |
|                                        | 50-59                | 21           | 0       | 3               | 3        | 0        | 24           | 58      | 3               | 11       | 71       | 173          | 359     | 25              | 76       | 67       |
|                                        | 60+                  | 385          | 137     | 24              | 32       | 26       | 473          | 1,557   | 29              | 126      | 77       | 7,118        | 16,874  | 436             | 1,468    | 70       |
|                                        | 60-69                | 44           | 5       | 6               | 7        | 10       | 56           | 183     | 8               | 34       | 77       | 543          | 1,266   | 77              | 255      | 70       |
|                                        | 70-79                | 127          | 39      | 22              | 28       | 23       | 105          | 433     | 18              | 92       | 80       | 1,626        | 4,247   | 274             | 988      | 72       |
|                                        | 80+                  | 214          | 93      | 68              | 97       | 30       | 312          | 941     | 99              | 397      | 75       | 4,949        | 11,361  | 1,497           | 4,932    | 70       |
| France                                 | 25-49                | 108          | 13      | 1               | 1        | 11       | 323          | 555     | 2               | 4        | 63       | 816          | 1,705   | 4               | 12       | 68       |
|                                        | 50-59                | 275          | 71      | 3               | 4        | 21       | 630          | 1,381   | 7               | 23       | 69       | 1,744        | 3,871   | 20              | 63       | 69       |
|                                        | 60+                  | 3,952        | 4,301   | 22              | 45       | 52       | 8,932        | 21,943  | 49              | 170      | 71       | 40,510       | 86,030  | 220             | 688      | 68       |

|                                        |                      | Alpha        |         |                 |          |          | Delta        |         |                 |          |          | Omicron      |         |                 |          |          |
|----------------------------------------|----------------------|--------------|---------|-----------------|----------|----------|--------------|---------|-----------------|----------|----------|--------------|---------|-----------------|----------|----------|
|                                        |                      | Total deaths |         | Mortality rates |          |          | Total deaths |         | Mortality rates |          |          | Total deaths |         | Mortality rates |          |          |
| Countries,<br>areas and<br>territories | Age group<br>(years) | Reported     | Averted | Reported        | Expected | % change | Reported     | Averted | Reported        | Expected | % change | Reported     | Averted | Reported        | Expected | % change |
|                                        |                      |              | 60-69   | 741             | 330      | 9        | 13           | 31      | 1,435           | 3,429    | 18       | 61           | 70      | 4,851           | 10,641   | 60       |
|                                        | 70-79                | 1,152        | 1,234   | 19              | 40       | 52       | 2,478        | 6,985   | 41              | 158      | 74       | 9,652        | 21,425  | 155             | 499      | 69       |
|                                        | 80+                  | 2,059        | 2,737   | 50              | 116      | 57       | 5,019        | 11,529  | 121             | 400      | 70       | 26,007       | 53,964  | 637             | 1,957    | 67       |
| Germany                                | 60+                  | 13,745       | 2,260   | 57              | 66       | 14       | 23,456       | 54,798  | 97              | 325      | 70       | 51,332       | 109,368 | 210             | 658      | 68       |
|                                        | 25-49                | 195          | 0       | 6               | 6        | 0        | 308          | 350     | 9               | 19       | 53       | 282          | 352     | 8               | 19       | 56       |
|                                        | 50-59                | 596          | 29      | 39              | 41       | 5        | 582          | 852     | 38              | 94       | 59       | 632          | 932     | 41              | 101      | 60       |
|                                        | 60+                  | 6,957        | 2,241   | 225             | 297      | 24       | 6,860        | 11,025  | 222             | 578      | 62       | 15,180       | 31,184  | 495             | 1,510    | 67       |
| Greece                                 | 60-69                | 1,355        | 201     | 104             | 119      | 13       | 1,259        | 2,147   | 97              | 261      | 63       | 1,708        | 3,276   | 129             | 377      | 66       |
|                                        | 70-79                | 2,221        | 402     | 218             | 258      | 15       | 1,875        | 3,440   | 184             | 523      | 65       | 3,402        | 7,543   | 342             | 1,101    | 69       |
|                                        | 80+                  | 3,381        | 1,638   | 436             | 647      | 33       | 3,726        | 5,438   | 480             | 1,181    | 59       | 10,070       | 20,365  | 1,335           | 4,036    | 67       |
|                                        | 25-49                | 10           | 6       | 0               | 0        | 38       | 675          | 725     | 20              | 41       | 52       | 163          | 145     | 5               | 9        | 47       |
|                                        | 50-59                | 10           | 8       | 1               | 1        | 44       | 1,015        | 1,453   | 80              | 195      | 59       | 478          | 558     | 38              | 82       | 54       |
| Hungary                                | 60+                  | 64           | 133     | 2               | 8        | 68       | 8,619        | 18,271  | 335             | 1,046    | 68       | 7,720        | 11,736  | 300             | 757      | 60       |

|                                        |                      | Alpha        |         |                 |          |          | Delta        |         |                 |          |          | Omicron      |         |                 |          |          |
|----------------------------------------|----------------------|--------------|---------|-----------------|----------|----------|--------------|---------|-----------------|----------|----------|--------------|---------|-----------------|----------|----------|
|                                        |                      | Total deaths |         | Mortality rates |          |          | Total deaths |         | Mortality rates |          |          | Total deaths |         | Mortality rates |          |          |
| Countries,<br>areas and<br>territories | Age group<br>(years) | Reported     | Averted | Reported        | Expected | % change | Reported     | Averted | Reported        | Expected | % change | Reported     | Averted | Reported        | Expected | % change |
|                                        |                      |              | 60-69   | 14              | 27       | 1        | 3            | 66      | 2,240           | 4,558    | 181      | 548          | 67      | 1,299           | 2,194    | 105      |
|                                        | 70-79                | 23           | 60      | 3               | 9        | 72       | 2,917        | 7,620   | 329             | 1,190    | 72       | 2,339        | 4,181   | 264             | 736      | 64       |
|                                        | 80+                  | 27           | 46      | 6               | 16       | 63       | 3,462        | 6,093   | 777             | 2,146    | 64       | 4,082        | 5,361   | 917             | 2,120    | 57       |
| Iceland                                | 25-49                | 0            | 0       | 0               | 0        | -        | 0            | 0       | 0               | 0        | -        | 1            | 3       | 1               | 3        | 75       |
|                                        | 50-59                | 1            | 0       | 2               | 2        | 0        | 0            | 0       | 0               | 0        | -        | 4            | 10      | 9               | 32       | 71       |
|                                        | 60+                  | 0            | 0       | 0               | 0        | -        | 2            | 13      | 3               | 20       | 87       | 223          | 544     | 288             | 992      | 71       |
|                                        | 60-69                | 0            | 0       | 0               | 0        | -        | 0            | 0       | 0               | 0        | -        | 12           | 28      | 31              | 103      | 70       |
|                                        | 70-79                | 0            | 0       | 0               | 0        | -        | 2            | 13      | 8               | 62       | 87       | 53           | 143     | 210             | 775      | 73       |
|                                        | 80+                  | 0            | 0       | 0               | 0        | -        | 0            | 0       | 0               | 0        | -        | 158          | 373     | 1,207           | 4,057    | 70       |
| Ireland                                | 25-49                | 49           | 0       | 3               | 3        | 0        | 25           | 58      | 1               | 5        | 70       | 63           | 104     | 4               | 10       | 62       |
|                                        | 50-59                | 92           | 0       | 15              | 15       | 0        | 38           | 208     | 6               | 40       | 85       | 101          | 283     | 16              | 61       | 74       |
|                                        | 60+                  | 2,531        | 127     | 252             | 265      | 5        | 594          | 2,343   | 59              | 293      | 80       | 2,311        | 6,237   | 224             | 829      | 73       |
|                                        | 60-69                | 292          | 4       | 59              | 60       | 1        | 89           | 512     | 18              | 122      | 85       | 240          | 654     | 48              | 178      | 73       |
|                                        | 70-79                | 655          | 34      | 196             | 206      | 5        | 173          | 924     | 52              | 328      | 84       | 575          | 1,874   | 166             | 708      | 77       |
|                                        | 80+                  | 1,584        | 89      | 900             | 951      | 5        | 332          | 907     | 189             | 704      | 73       | 1,496        | 3,709   | 822             | 2,861    | 71       |

|                                        |                      | Alpha        |         |                 |          |          | Delta        |         |                 |          |          | Omicron      |         |                 |          |          |
|----------------------------------------|----------------------|--------------|---------|-----------------|----------|----------|--------------|---------|-----------------|----------|----------|--------------|---------|-----------------|----------|----------|
|                                        |                      | Total deaths |         | Mortality rates |          |          | Total deaths |         | Mortality rates |          |          | Total deaths |         | Mortality rates |          |          |
| Countries,<br>areas and<br>territories | Age group<br>(years) | Reported     | Averted | Reported        | Expected | % change | Reported     | Averted | Reported        | Expected | % change | Reported     | Averted | Reported        | Expected | % change |
|                                        |                      | Israel       | 25-49   | 99              | 58       | 4        | 6            | 37      | 69              | 218      | 3        | 10           | 76      | 66              | 134      | 2        |
| 50-59                                  | 149                  |              | 217     | 19              | 46       | 59       | 104          | 501     | 13              | 76       | 83       | 137          | 365     | 17              | 63       | 73       |
| 60+                                    | 1,709                |              | 4,366   | 131             | 467      | 72       | 1,634        | 10,252  | 126             | 914      | 86       | 3,913        | 12,520  | 301             | 1,264    | 76       |
| Italy                                  | 25-49                | 416          | 24      | 2               | 2        | 5        | 222          | 334     | 1               | 3        | 60       | 805          | 1,456   | 4               | 12       | 64       |
|                                        | 50-59                | 1,374        | 121     | 15              | 16       | 8        | 523          | 1,097   | 6               | 17       | 68       | 1,802        | 3,581   | 19              | 56       | 67       |
|                                        | 60+                  | 26,877       | 7,194   | 150             | 190      | 21       | 8,461        | 28,102  | 47              | 204      | 77       | 54,404       | 145,853 | 300             | 1,106    | 73       |
|                                        | 60-69                | 3,927        | 364     | 53              | 58       | 8        | 1,037        | 2,691   | 14              | 50       | 72       | 4,582        | 9,905   | 60              | 191      | 68       |
|                                        | 70-79                | 8,406        | 877     | 140             | 155      | 9        | 2,156        | 5,968   | 36              | 136      | 73       | 11,835       | 28,361  | 197             | 668      | 71       |
|                                        | 80+                  | 14,544       | 5,953   | 325             | 458      | 29       | 5,268        | 19,443  | 118             | 552      | 79       | 37,987       | 107,587 | 843             | 3,231    | 74       |
| Latvia                                 | 25-49                | 27           | 0       | 4               | 4        | 0        | 91           | 94      | 15              | 30       | 51       | 63           | 82      | 10              | 24       | 57       |
|                                        | 50-59                | 67           | 1       | 26              | 26       | 1        | 154          | 170     | 60              | 126      | 52       | 88           | 139     | 34              | 88       | 61       |
|                                        | 60+                  | 631          | 59      | 120             | 131      | 9        | 1,785        | 1,545   | 339             | 633      | 46       | 1,440        | 1,713   | 274             | 599      | 54       |
|                                        | 60-69                | 122          | 5       | 50              | 52       | 4        | 377          | 423     | 153             | 324      | 53       | 204          | 321     | 83              | 212      | 61       |
|                                        | 70-79                | 190          | 25      | 113             | 127      | 12       | 538          | 541     | 324             | 650      | 50       | 400          | 581     | 241             | 591      | 59       |
|                                        | 80+                  | 319          | 29      | 281             | 307      | 8        | 870          | 581     | 768             | 1,280    | 40       | 836          | 811     | 738             | 1,453    | 49       |

|                                        |                      | Alpha        |         |                 |          |          | Delta        |         |                 |          |          | Omicron      |         |                 |          |          |
|----------------------------------------|----------------------|--------------|---------|-----------------|----------|----------|--------------|---------|-----------------|----------|----------|--------------|---------|-----------------|----------|----------|
|                                        |                      | Total deaths |         | Mortality rates |          |          | Total deaths |         | Mortality rates |          |          | Total deaths |         | Mortality rates |          |          |
| Countries,<br>areas and<br>territories | Age group<br>(years) | Reported     | Averted | Reported        | Expected | % change | Reported     | Averted | Reported        | Expected | % change | Reported     | Averted | Reported        | Expected | % change |
|                                        |                      | Lithuania    | 25-49   | 11              | 0        | 1        | 1            | 0       | 166             | 240      | 18       | 44           | 59      | 35              | 39       | 4        |
| 50-59                                  | 30                   |              | 3       | 7               | 8        | 9        | 251          | 394     | 61              | 156      | 61       | 41           | 51      | 10              | 22       | 55       |
| 60+                                    | 298                  |              | 147     | 39              | 58       | 33       | 3,132        | 4,000   | 412             | 937      | 56       | 1,482        | 1,687   | 190             | 407      | 53       |
| 60-69                                  | 54                   |              | 14      | 15              | 19       | 21       | 495          | 886     | 137             | 384      | 64       | 164          | 215     | 43              | 100      | 57       |
| 70-79                                  | 79                   |              | 49      | 33              | 54       | 38       | 938          | 1,555   | 398             | 1,057    | 62       | 389          | 550     | 161             | 390      | 59       |
| 80+                                    | 165                  |              | 84      | 100             | 151      | 34       | 1,699        | 1,559   | 1,029           | 1,973    | 48       | 929          | 922     | 588             | 1,171    | 50       |
| Luxembourg                             | 25-49                | 6            | 0       | 2               | 2        | 0        | 1            | 0       | 0               | 0        | 0        | 5            | 0       | 2               | 2        | 0        |
|                                        | 50-59                | 9            | 0       | 10              | 10       | 0        | 6            | 11      | 7               | 19       | 65       | 19           | 28      | 21              | 51       | 60       |
|                                        | 60+                  | 228          | 28      | 178             | 200      | 11       | 82           | 265     | 64              | 271      | 76       | 321          | 843     | 243             | 882      | 72       |
|                                        | 60-69                | 29           | 0       | 46              | 46       | 0        | 14           | 23      | 22              | 58       | 62       | 35           | 66      | 53              | 153      | 65       |
|                                        | 70-79                | 46           | 3       | 117             | 124      | 6        | 17           | 41      | 43              | 147      | 71       | 63           | 116     | 156             | 442      | 65       |
|                                        | 80+                  | 153          | 25      | 609             | 708      | 14       | 51           | 201     | 203             | 1,003    | 80       | 223          | 661     | 878             | 3,480    | 75       |
| Malta                                  | 25-49                | 0            | 0       | 0               | 0        | -        | 2            | 6       | 1               | 4        | 75       | 12           | 26      | 6               | 18       | 68       |
|                                        | 50-59                | 0            | 0       | 0               | 0        | -        | 0            | 0       | 0               | 0        | -        | 10           | 19      | 17              | 49       | 66       |
|                                        | 60+                  | 19           | 17      | 15              | 28       | 47       | 50           | 255     | 39              | 237      | 84       | 334          | 943     | 259             | 990      | 74       |

|                                        |                      | Alpha        |         |                 |          |          | Delta        |         |                 |          |          | Omicron      |         |                 |          |          |
|----------------------------------------|----------------------|--------------|---------|-----------------|----------|----------|--------------|---------|-----------------|----------|----------|--------------|---------|-----------------|----------|----------|
|                                        |                      | Total deaths |         | Mortality rates |          |          | Total deaths |         | Mortality rates |          |          | Total deaths |         | Mortality rates |          |          |
| Countries,<br>areas and<br>territories | Age group<br>(years) | Reported     | Averted | Reported        | Expected | % change | Reported     | Averted | Reported        | Expected | % change | Reported     | Averted | Reported        | Expected | % change |
|                                        |                      |              | 60-69   | 2               | 0        | 3        | 3            | 0       | 14              | 55       | 23       | 116          | 80      | 43              | 116      | 72       |
|                                        | 70-79                | 6            | 0       | 13              | 13       | 0        | 16           | 94      | 34              | 230      | 85       | 93           | 258     | 195             | 735      | 74       |
|                                        | 80+                  | 11           | 17      | 51              | 130      | 61       | 20           | 106     | 93              | 587      | 84       | 198          | 569     | 922             | 3,572    | 74       |
| Montenegro                             | 25-49                | 1            | 0       | 0               | 0        | 0        | 44           | 18      | 20              | 29       | 29       |              |         |                 |          |          |
|                                        | 50-59                | 0            | 0       | 0               | 0        | -        | 70           | 46      | 87              | 144      | 40       |              |         |                 |          |          |
|                                        | 60+                  | 78           | 33      | 28              | 40       | 30       | 1,872        | 2,001   | 674             | 1,395    | 52       |              |         |                 |          |          |
|                                        | 60-69                | 5            | 1       | 6               | 8        | 17       | 179          | 185     | 233             | 473      | 51       |              |         |                 |          |          |
|                                        | 70-79                | 11           | 6       | 27              | 42       | 35       | 237          | 316     | 586             | 1,368    | 57       |              |         |                 |          |          |
|                                        | 80+                  | 10           | 4       | 47              | 65       | 29       | 208          | 166     | 971             | 1,747    | 44       |              |         |                 |          |          |
| Netherlands                            | 25-49                | 31           | 0       | 1               | 1        | 0        | 46           | 53      | 1               | 2        | 54       | 29           | 22      | 1               | 1        | 43       |
|                                        | 50-59                | 113          | 0       | 4               | 4        | 0        | 73           | 161     | 3               | 9        | 69       | 86           | 127     | 3               | 8        | 60       |
|                                        | 60+                  | 2,468        | 764     | 54              | 70       | 24       | 3,075        | 12,534  | 67              | 340      | 80       | 1,904        | 5,276   | 41              | 153      | 73       |
|                                        | 60-69                | 345          | 51      | 16              | 18       | 13       | 238          | 911     | 11              | 54       | 79       | 203          | 431     | 9               | 29       | 68       |
|                                        | 70-79                | 826          | 61      | 51              | 55       | 7        | 666          | 3,324   | 41              | 247      | 83       | 501          | 1,296   | 30              | 109      | 72       |

|                                        |                      | Alpha        |         |                 |          |          | Delta        |         |                 |          |          | Omicron      |         |                 |          |          |
|----------------------------------------|----------------------|--------------|---------|-----------------|----------|----------|--------------|---------|-----------------|----------|----------|--------------|---------|-----------------|----------|----------|
|                                        |                      | Total deaths |         | Mortality rates |          |          | Total deaths |         | Mortality rates |          |          | Total deaths |         | Mortality rates |          |          |
| Countries,<br>areas and<br>territories | Age group<br>(years) | Reported     | Averted | Reported        | Expected | % change | Reported     | Averted | Reported        | Expected | % change | Reported     | Averted | Reported        | Expected | % change |
|                                        |                      |              | 80+     | 1,297           | 652      | 155      | 232          | 33      | 2,171           | 8,299    | 259      | 1,248        | 79      | 1,200           | 3,549    | 141      |
| North Macedonia                        | 25-49                | 158          | 7       | 25              | 27       | 4        | 166          | 73      | 27              | 38       | 31       | 40           | 15      | 6               | 9        | 27       |
|                                        | 50-59                | 309          | 14      | 122             | 127      | 4        | 243          | 168     | 96              | 162      | 41       | 69           | 45      | 27              | 45       | 39       |
|                                        | 60+                  | 2,697        | 132     | 613             | 643      | 5        | 1,815        | 1,814   | 412             | 825      | 50       | 1,390        | 1,070   | 582             | 1,029    | 43       |
|                                        | 60-69                | 872          | 39      | 365             | 381      | 4        | 570          | 571     | 239             | 477      | 50       | 297          | 259     | 124             | 233      | 47       |
|                                        | 70-79                | 1,171        | 67      | 807             | 853      | 5        | 721          | 855     | 497             | 1,086    | 54       | 539          | 496     | 372             | 713      | 48       |
|                                        | 80+                  | 654          | 26      | 1,166           | 1,212    | 4        | 524          | 388     | 934             | 1,626    | 43       | 554          | 315     | 988             | 1,549    | 36       |
| Norway                                 | 25-49                | 10           | 0       | 1               | 1        | 0        | 11           | 20      | 1               | 2        | 65       |              |         |                 |          |          |
|                                        | 50-59                | 18           | 0       | 3               | 3        | 0        | 23           | 79      | 3               | 14       | 77       |              |         |                 |          |          |
|                                        | 60+                  | 672          | 243     | 26              | 36       | 27       | 1,638        | 4,809   | 64              | 253      | 75       |              |         |                 |          |          |
|                                        | 60-69                | 44           | 0       | 7               | 7        | 0        | 55           | 192     | 9               | 42       | 78       |              |         |                 |          |          |
|                                        | 70-79                | 71           | 6       | 16              | 17       | 8        | 153          | 474     | 34              | 139      | 76       |              |         |                 |          |          |
|                                        | 80+                  | 109          | 75      | 46              | 78       | 41       | 338          | 937     | 143             | 539      | 73       |              |         |                 |          |          |
| Po<br>la<br>nd                         | 25-49                | 209          | 2       | 1               | 2        | 1        | 92           | 72      | 1               | 1        | 44       |              |         |                 |          |          |



|                                        |                      | Alpha        |         |                 |          |          | Delta        |         |                 |          |          | Omicron      |         |                 |          |          |
|----------------------------------------|----------------------|--------------|---------|-----------------|----------|----------|--------------|---------|-----------------|----------|----------|--------------|---------|-----------------|----------|----------|
|                                        |                      | Total deaths |         | Mortality rates |          |          | Total deaths |         | Mortality rates |          |          | Total deaths |         | Mortality rates |          |          |
| Countries,<br>areas and<br>territories | Age group<br>(years) | Reported     | Averted | Reported        | Expected | % change | Reported     | Averted | Reported        | Expected | % change | Reported     | Averted | Reported        | Expected | % change |
|                                        |                      |              | 50-59   | 348             | 26       | 8        | 8            | 7       | 89              | 94       | 2        | 4            | 51      |                 |          |          |
|                                        | 60+                  | 16,032       | 3,195   | 82              | 99       | 17       | 4,920        | 6,453   | 25              | 58       | 57       |              |         |                 |          |          |
|                                        | 60-69                | 1,422        | 108     | 28              | 30       | 7        | 300          | 435     | 6               | 15       | 59       |              |         |                 |          |          |
|                                        | 70-79                | 1,800        | 262     | 59              | 67       | 13       | 542          | 792     | 18              | 44       | 59       |              |         |                 |          |          |
|                                        | 80+                  | 2,122        | 695     | 131             | 174      | 25       | 798          | 924     | 49              | 106      | 54       |              |         |                 |          |          |
| Portugal                               | 25-49                | 15           | 0       | 0               | 0        | 0        | 43           | 117     | 1               | 5        | 73       | 106          | 274     | 3               | 11       | 72       |
|                                        | 50-59                | 45           | 0       | 3               | 3        | 0        | 87           | 310     | 6               | 27       | 78       | 203          | 574     | 13              | 52       | 74       |
|                                        | 60+                  | 955          | 131     | 30              | 35       | 12       | 1,835        | 7,745   | 58              | 304      | 81       | 7,092        | 20,633  | 221             | 865      | 74       |
|                                        | 60-69                | 128          | 1       | 9               | 9        | 1        | 214          | 793     | 16              | 74       | 79       | 515          | 1,548   | 37              | 149      | 75       |
|                                        | 70-79                | 279          | 13      | 26              | 27       | 4        | 487          | 1,855   | 46              | 220      | 79       | 1,386        | 3,958   | 126             | 487      | 74       |
|                                        | 80+                  | 548          | 117     | 76              | 93       | 18       | 1,134        | 5,097   | 158             | 869      | 82       | 5,191        | 15,127  | 717             | 2,806    | 74       |
| Republic<br>of<br>Moldova              | 60+                  | 1,322        | 10      | 187             | 188      | 1        | 2,060        | 990     | 291             | 430      | 32       | 1,467        | 725     | 207             | 309      | 33       |
| R o E                                  | 25-49                | 15           | 0       | 0               | 0        | 0        | 1,252        | 520     | 19              | 27       | 29       | 197          | 110     | 3               | 5        | 36       |

|                                        |                      | Alpha        |         |                 |          |          | Delta        |         |                 |          |          | Omicron      |         |                 |          |          |
|----------------------------------------|----------------------|--------------|---------|-----------------|----------|----------|--------------|---------|-----------------|----------|----------|--------------|---------|-----------------|----------|----------|
|                                        |                      | Total deaths |         | Mortality rates |          |          | Total deaths |         | Mortality rates |          |          | Total deaths |         | Mortality rates |          |          |
| Countries,<br>areas and<br>territories | Age group<br>(years) | Reported     | Averted | Reported        | Expected | % change | Reported     | Averted | Reported        | Expected | % change | Reported     | Averted | Reported        | Expected | % change |
|                                        |                      |              | 50-59   | 37              | 6        | 1        | 2            | 14      | 2,261           | 1,138    | 87       | 131          | 33      | 409             | 240      | 15       |
|                                        | 60+                  | 363          | 50      | 7               | 8        | 12       | 20,890       | 8,351   | 423             | 593      | 29       | 6,188        | 2,510   | 126             | 177      | 29       |
|                                        | 60-69                | 89           | 16      | 4               | 4        | 15       | 6,035        | 3,245   | 247             | 380      | 35       | 1,259        | 758     | 51              | 81       | 38       |
|                                        | 70-79                | 141          | 25      | 9               | 11       | 15       | 8,094        | 3,689   | 517             | 752      | 31       | 2,130        | 1,035   | 133             | 198      | 33       |
|                                        | 80+                  | 133          | 9       | 14              | 15       | 6        | 6,761        | 1,417   | 731             | 884      | 17       | 2,799        | 717     | 331             | 415      | 20       |
| Slovakia                               | 25-49                | 336          | 0       | 16              | 16       | 0        | 223          | 148     | 11              | 18       | 40       | 63           | 29      | 3               | 5        | 32       |
|                                        | 50-59                | 721          | 24      | 103             | 106      | 3        | 428          | 378     | 61              | 115      | 47       | 111          | 86      | 16              | 28       | 44       |
|                                        | 60+                  | 7,615        | 398     | 592             | 623      | 5        | 4,644        | 4,462   | 359             | 704      | 49       | 1,955        | 1,956   | 151             | 302      | 50       |
|                                        | 60-69                | 2,164        | 79      | 314             | 326      | 4        | 1,220        | 1,260   | 178             | 361      | 51       | 363          | 409     | 53              | 112      | 53       |
|                                        | 70-79                | 2,900        | 164     | 711             | 751      | 5        | 1,688        | 1,959   | 399             | 862      | 54       | 656          | 780     | 155             | 340      | 54       |
|                                        | 80+                  | 2,551        | 155     | 1,349           | 1,431    | 6        | 1,736        | 1,243   | 945             | 1,622    | 42       | 936          | 767     | 510             | 927      | 45       |
| Slovenia                               | 25-49                | 19           | 0       | 3               | 3        | 0        | 24           | 12      | 3               | 5        | 33       | 40           | 16      | 6               | 8        | 29       |
|                                        | 50-59                | 43           | 0       | 14              | 14       | 0        | 63           | 71      | 21              | 44       | 53       | 96           | 88      | 32              | 61       | 48       |
|                                        | 60+                  | 996          | 199     | 172             | 206      | 17       | 1,235        | 1,640   | 213             | 496      | 57       | 3,001        | 3,515   | 510             | 1,108    | 54       |
|                                        | 60-69                | 159          | 9       | 57              | 60       | 5        | 185          | 255     | 66              | 157      | 58       | 348          | 435     | 123             | 278      | 56       |

|                                        |                      | Alpha        |         |                 |          |          | Delta        |         |                 |          |          | Omicron      |         |                 |          |          |
|----------------------------------------|----------------------|--------------|---------|-----------------|----------|----------|--------------|---------|-----------------|----------|----------|--------------|---------|-----------------|----------|----------|
|                                        |                      | Total deaths |         | Mortality rates |          |          | Total deaths |         | Mortality rates |          |          | Total deaths |         | Mortality rates |          |          |
| Countries,<br>areas and<br>territories | Age group<br>(years) | Reported     | Averted | Reported        | Expected | % change | Reported     | Averted | Reported        | Expected | % change | Reported     | Averted | Reported        | Expected | % change |
|                                        |                      |              | 70-79   | 267             | 27       | 145      | 160          | 9       | 320             | 540      | 174      | 469          | 63      | 643             | 947      | 340      |
|                                        | 80+                  | 570          | 163     | 493             | 634      | 22       | 730          | 845     | 631             | 1,362    | 54       | 2,010        | 2,133   | 1,710           | 3,525    | 51       |
| Spain                                  | 25-49                | 374          | 6       | 2               | 2        | 2        | 259          | 343     | 2               | 4        | 57       | 461          | 770     | 3               | 8        | 63       |
|                                        | 50-59                | 1,177        | 40      | 17              | 17       | 3        | 404          | 1,474   | 6               | 26       | 78       | 1,039        | 2,134   | 14              | 44       | 67       |
|                                        | 60+                  | 25,616       | 4,236   | 207             | 241      | 14       | 7,067        | 40,211  | 57              | 382      | 85       | 28,897       | 86,116  | 229             | 911      | 75       |
|                                        | 60-69                | 3,131        | 299     | 57              | 62       | 9        | 915          | 3,301   | 17              | 77       | 78       | 2,779        | 6,722   | 49              | 168      | 71       |
|                                        | 70-79                | 6,436        | 631     | 161             | 177      | 9        | 1,404        | 7,796   | 35              | 230      | 85       | 5,801        | 16,650  | 142             | 549      | 74       |
|                                        | 80+                  | 16,049       | 3,306   | 557             | 671      | 17       | 4,748        | 29,114  | 165             | 1,174    | 86       | 20,317       | 62,744  | 705             | 2,881    | 76       |
| Sweden                                 | 25-49                | 72           | 0       | 2               | 2        | 0        | 20           | 17      | 1               | 1        | 46       | 98           | 113     | 3               | 6        | 54       |
|                                        | 50-59                | 157          | 2       | 12              | 12       | 1        | 21           | 55      | 2               | 6        | 72       | 184          | 303     | 14              | 36       | 62       |
|                                        | 60+                  | 4,308        | 578     | 160             | 182      | 12       | 574          | 1,513   | 21              | 78       | 72       | 8,226        | 15,973  | 302             | 889      | 66       |
|                                        | 60-69                | 440          | 41      | 40              | 43       | 9        | 53           | 166     | 5               | 20       | 76       | 518          | 1,121   | 46              | 147      | 68       |
|                                        | 70-79                | 1,161        | 138     | 114             | 127      | 11       | 156          | 514     | 15              | 66       | 77       | 1,952        | 4,893   | 191             | 670      | 71       |
|                                        | 80+                  | 2,707        | 399     | 484             | 555      | 13       | 365          | 833     | 65              | 214      | 70       | 5,756        | 9,959   | 988             | 2,699    | 63       |

|                                        |                      | Alpha        |         |                 |          |          | Delta        |         |                 |          |          | Omicron      |         |                 |          |          |
|----------------------------------------|----------------------|--------------|---------|-----------------|----------|----------|--------------|---------|-----------------|----------|----------|--------------|---------|-----------------|----------|----------|
|                                        |                      | Total deaths |         | Mortality rates |          |          | Total deaths |         | Mortality rates |          |          | Total deaths |         | Mortality rates |          |          |
| Countries,<br>areas and<br>territories | Age group<br>(years) | Reported     | Averted | Reported        | Expected | % change | Reported     | Averted | Reported        | Expected | % change | Reported     | Averted | Reported        | Expected | % change |
|                                        |                      | Switzerland  | 25-49   | 10              | 0        | 0        | 0            | 0       | 30              | 30       | 1        | 2            | 50      | 29              | 17       | 1        |
| 50-59                                  | 48                   |              | 0       | 4               | 4        | 0        | 70           | 103     | 5               | 13       | 60       | 71           | 87      | 5               | 12       | 55       |
| 60+                                    | 764                  |              | 369     | 35              | 51       | 33       | 1,612        | 3,772   | 73              | 244      | 70       | 1,901        | 4,479   | 86              | 289      | 70       |
| 60-69                                  | 117                  |              | 12      | 12              | 13       | 9        | 169          | 300     | 17              | 47       | 64       | 168          | 266     | 17              | 44       | 61       |
| 70-79                                  | 220                  |              | 71      | 30              | 39       | 24       | 332          | 744     | 45              | 145      | 69       | 420          | 926     | 56              | 181      | 69       |
| 80+                                    | 427                  |              | 286     | 90              | 151      | 40       | 1,111        | 2,728   | 235             | 813      | 71       | 1,313        | 3,287   | 278             | 975      | 71       |
| Ukraine                                | 60+                  | 22,793       | 145     | 249             | 251      | 1        | 36,584       | 8,330   | 400             | 491      | 19       | 13,299       | 5,595   | 145             | 206      | 30       |
| United Kingdom (England)               | 25-49                | 1,677        | 46      | 9               | 9        | 3        | 1,301        | 2,264   | 7               | 19       | 64       | 2,158        | 3,609   | 12              | 31       | 63       |
|                                        | 50-59                | 3,514        | 234     | 45              | 49       | 6        | 1,733        | 5,654   | 22              | 96       | 77       | 3,506        | 8,385   | 45              | 154      | 71       |
|                                        | 60+                  | 58,904       | 23,427  | 428             | 599      | 28       | 17,769       | 95,635  | 129             | 825      | 84       | 77,789       | 257,278 | 566             | 2,437    | 77       |
|                                        | 60-69                | 7,295        | 721     | 120             | 132      | 9        | 3,074        | 15,330  | 51              | 304      | 83       | 7,769        | 24,442  | 128             | 532      | 76       |
|                                        | 70-79                | 14,401       | 3,036   | 295             | 358      | 17       | 5,099        | 26,052  | 105             | 639      | 84       | 18,644       | 60,879  | 382             | 1,631    | 77       |
|                                        | 80+                  | 37,208       | 19,670  | 1,321           | 2,019    | 35       | 9,596        | 54,253  | 341             | 2,267    | 85       | 51,376       | 171,957 | 1,824           | 7,930    | 77       |

|                                        |                      | Alpha                           |         |                 |          |          | Delta        |         |                 |          |          | Omicron      |         |                 |          |          |
|----------------------------------------|----------------------|---------------------------------|---------|-----------------|----------|----------|--------------|---------|-----------------|----------|----------|--------------|---------|-----------------|----------|----------|
|                                        |                      | Total deaths                    |         | Mortality rates |          |          | Total deaths |         | Mortality rates |          |          | Total deaths |         | Mortality rates |          |          |
| Countries,<br>areas and<br>territories | Age group<br>(years) | Reported                        | Averted | Reported        | Expected | % change | Reported     | Averted | Reported        | Expected | % change | Reported     | Averted | Reported        | Expected | % change |
|                                        |                      | United<br>Kingdom<br>(Scotland) | 25-49   | 61              | 0        | 3        | 3            | 0       | 119             | 220      | 7        | 19           | 65      | 123             | 193      | 7        |
| 50-59                                  | 176                  |                                 | 6       | 22              | 23       | 3        | 162          | 638     | 20              | 101      | 80       | 208          | 530     | 26              | 93       | 72       |
| 60+                                    | 2,923                |                                 | 308     | 204             | 225      | 10       | 1,889        | 7,220   | 132             | 635      | 79       | 4,484        | 15,225  | 313             | 1,374    | 77       |
| United Kingdom (Wales)                 | 25-49                | 52                              | 0       | 6               | 6        | 0        | 29           | 86      | 3               | 12       | 75       |              |         |                 |          |          |
|                                        | 50-59                | 130                             | 1       | 30              | 30       | 1        | 82           | 320     | 19              | 92       | 80       |              |         |                 |          |          |
|                                        | 60+                  | 6,372                           | 717     | 368             | 409      | 10       | 2,586        | 9,156   | 149             | 678      | 78       |              |         |                 |          |          |
|                                        | 60-69                | 291                             | 19      | 77              | 82       | 6        | 161          | 790     | 43              | 251      | 83       |              |         |                 |          |          |
|                                        | 70-79                | 589                             | 63      | 187             | 207      | 10       | 266          | 1,091   | 84              | 431      | 80       |              |         |                 |          |          |
|                                        | 80+                  | 1,244                           | 157     | 720             | 811      | 11       | 435          | 1,171   | 252             | 929      | 73       |              |         |                 |          |          |
| Kosovo <sup>[1]</sup>                  | 25-49                | 31                              | 0       | 5               | 5        | 0        | 40           | 5       | 6               | 7        | 11       | 6            | 3       | 1               | 1        | 33       |
|                                        | 50-59                | 82                              | 0       | 43              | 43       | 0        | 58           | 18      | 29              | 39       | 24       | 22           | 16      | 11              | 19       | 42       |
|                                        | 60+                  | 728                             | 0       | 301             | 301      | 0        | 348          | 286     | 139             | 254      | 45       | 153          | 122     | 61              | 110      | 44       |
|                                        | 60-69                | 193                             | 0       | 145             | 145      | 0        | 103          | 67      | 74              | 122      | 39       | 34           | 34      | 24              | 49       | 50       |
|                                        | 70-79                | 317                             | 0       | 431             | 431      | 0        | 142          | 159     | 189             | 400      | 53       | 63           | 63      | 84              | 168      | 50       |

|                                        |                      | Alpha        |         |                 |          |          | Delta        |         |                 |          |          | Omicron      |         |                 |          |          |
|----------------------------------------|----------------------|--------------|---------|-----------------|----------|----------|--------------|---------|-----------------|----------|----------|--------------|---------|-----------------|----------|----------|
|                                        |                      | Total deaths |         | Mortality rates |          |          | Total deaths |         | Mortality rates |          |          | Total deaths |         | Mortality rates |          |          |
| Countries,<br>areas and<br>territories | Age group<br>(years) | Reported     | Averted | Reported        | Expected | % change | Reported     | Averted | Reported        | Expected | % change | Reported     | Averted | Reported        | Expected | % change |
|                                        |                      | 80+          | 218     | 0               | 633      | 633      | 0            | 103     | 60              | 294      | 465      | 37           | 56      | 25              | 160      | 231      |

Mortality rates are per 100,000 population.

[1] All references to Kosovo in this document should be understood to be in the context of the United Nations Security Council resolution 1244 (1999).

Supplementary table 4: Cumulative Vaccination Uptake (VU), as well as reported mortality counts, lives saved per vaccine dose and mortality rates per 100,000 population, by countries, areas and territories (CAT), included in the analysis. Note: d<sub>1</sub> refers to first dose, d<sub>2</sub> refers to complete series, d<sub>3</sub> refers to first additional booster, d<sub>4</sub> refers to second additional booster and d<sub>5</sub> refers to third additional booster; the ≥60 years age group includes data for all 34 CAT.

| Countries, areas and territories | Age group (years) | Vaccination uptake |                 |                 |                 | Number of lives |                            |                            |                            |                            |                            |               | Mortality rate per 100,000 |                |          |
|----------------------------------|-------------------|--------------------|-----------------|-----------------|-----------------|-----------------|----------------------------|----------------------------|----------------------------|----------------------------|----------------------------|---------------|----------------------------|----------------|----------|
|                                  |                   | VU <sub>2</sub>    | VU <sub>3</sub> | VU <sub>4</sub> | VU <sub>5</sub> | Reported deaths | Saved after d <sub>1</sub> | Saved after d <sub>2</sub> | Saved after d <sub>3</sub> | Saved after d <sub>4</sub> | Saved after d <sub>5</sub> | Total averted | Reported                   | Total Expected | % change |
| Austria                          | 25-49             | 72                 | 61              | 12              | <1%             | 272             | 17                         | 87                         | 93                         | 0                          | 0                          | 197           | 9                          | 16             | 44       |
|                                  | 50-59             | 80                 | 74              | 22              | 1               | 687             | 52                         | 249                        | 310                        | 12                         | 0                          | 623           | 49                         | 94             | 48       |
|                                  | 60+               | 88                 | 83              | 44              | 2               | 16,259          | 855                        | 6,359                      | 12,937                     | 1,911                      | 32                         | 22,094        | 691                        | 1,631          | 58       |
|                                  | 60-69             | 84                 | 79              | 37              | 1               | 1,837           | 97                         | 686                        | 955                        | 91                         | 0                          | 1,829         | 169                        | 337            | 50       |
|                                  | 70-79             | 89                 | 85              | 49              | 2               | 3,882           | 189                        | 1,235                      | 2,415                      | 377                        | 3                          | 4,219         | 523                        | 1,092          | 52       |
|                                  | 80+               | 95                 | 86              | 51              | 2               | 10,540          | 569                        | 4,438                      | 9,567                      | 1,443                      | 29                         | 16,046        | 2,011                      | 5,072          | 60       |
| Belgium                          | 25-49             | 79                 | 66              | 23              | 1               | 98              | 3                          | 62                         | 19                         | 0                          | 0                          | 84            | 3                          | 5              | 40       |
|                                  | 50-59             | 86                 | 82              | 48              | 3               | 516             | 38                         | 293                        | 257                        | 25                         | 0                          | 613           | 33                         | 71             | 54       |
|                                  | 60+               | 94                 | 91              | 70              | 14              | 15,307          | 853                        | 6,172                      | 15,157                     | 2,504                      | 1,014                      | 25,700        | 508                        | 1,360          | 63       |
|                                  | 60-69             | 92                 | 89              | 65              | 5               | 1,814           | 95                         | 1,063                      | 1,214                      | 242                        | 19                         | 2,633         | 130                        | 320            | 59       |
|                                  | 70-79             | 95                 | 92              | 74              | 8               | 3,749           | 209                        | 1,866                      | 3,456                      | 624                        | 62                         | 6,217         | 382                        | 1,016          | 62       |
|                                  | 80+               | 98                 | 94              | 74              | 41              | 9,744           | 549                        | 3,243                      | 10,487                     | 1,638                      | 933                        | 16,850        | 1,514                      | 4,131          | 63       |
| Croatia                          | 25-49             | 54                 | 16              | 0               | <1%             | 81              | 3                          | 13                         | 3                          | 0                          | 0                          | 19            | 7                          | 8              | 12       |

|                                  |                   | Vaccination uptake |                 |                 |                 | Number of lives |                            |                            |                            |                            |                            |               | Mortality rate per 100,000 |                |          |
|----------------------------------|-------------------|--------------------|-----------------|-----------------|-----------------|-----------------|----------------------------|----------------------------|----------------------------|----------------------------|----------------------------|---------------|----------------------------|----------------|----------|
| Countries, areas and territories | Age group (years) | VU <sub>2</sub>    | VU <sub>3</sub> | VU <sub>4</sub> | VU <sub>5</sub> | Reported deaths | Saved after d <sub>1</sub> | Saved after d <sub>2</sub> | Saved after d <sub>3</sub> | Saved after d <sub>4</sub> | Saved after d <sub>5</sub> | Total averted | Reported                   | Total Expected | % change |
|                                  | 50-59             | 68                 | 30              | 1               | <1%             | 203             | 13                         | 88                         | 43                         | 0                          | 0                          | 144           | 38                         | 65             | 42       |
|                                  | 60+               | 75                 | 53              | 5               | 1               | 4,521           | 209                        | 1,342                      | 1,836                      | 52                         | 14                         | 3,453         | 391                        | 690            | 43       |
|                                  | 60-69             | 76                 | 47              | 3               | <1%             | 716             | 41                         | 295                        | 268                        | 0                          | 0                          | 604           | 126                        | 233            | 46       |
|                                  | 70-79             | 78                 | 62              | 7               | 2               | 1,369           | 67                         | 479                        | 676                        | 18                         | 3                          | 1,243         | 364                        | 694            | 48       |
|                                  | 80+               | 66                 | 53              | 7               | 2               | 2,436           | 101                        | 568                        | 892                        | 34                         | 11                         | 1,606         | 1,151                      | 1,910          | 40       |
| Cyprus                           | 25-49             | 78                 | 59              | 2               | <1%             | 46              | 0                          | 23                         | 6                          | 0                          | 0                          | 29            | 13                         | 22             | 41       |
|                                  | 50-59             | 82                 | 74              | 6               | <1%             | 75              | 0                          | 51                         | 43                         | 0                          | 0                          | 94            | 69                         | 155            | 55       |
|                                  | 60+               | 90                 | 85              | 29              | 7               | 1,369           | 84                         | 985                        | 1,294                      | 158                        | 14                         | 2,535         | 680                        | 1,939          | 65       |
|                                  | 60-69             | 88                 | 82              | 20              | 3               | 211             | 4                          | 124                        | 128                        | 0                          | 0                          | 256           | 218                        | 483            | 55       |
|                                  | 70-79             | 93                 | 90              | 38              | 10              | 387             | 20                         | 312                        | 378                        | 39                         | 0                          | 749           | 561                        | 1,647          | 66       |
|                                  | 80+               | 91                 | 84              | 38              | 11              | 771             | 60                         | 549                        | 788                        | 119                        | 14                         | 1,530         | 2,166                      | 6,463          | 66       |
| Czechia                          | 25-49             | 64                 | 37              | 2               | <1%             | 623             | 11                         | 162                        | 47                         | 0                          | 0                          | 220           | 17                         | 23             | 26       |
|                                  | 50-59             | 72                 | 54              | 6               | <1%             | 1,398           | 34                         | 418                        | 188                        | 0                          | 0                          | 640           | 102                        | 149            | 32       |
|                                  | 60+               | 83                 | 73              | 23              | <1%             | 31,271          | 1,293                      | 8,936                      | 12,854                     | 720                        | 0                          | 23,803        | 1,129                      | 1,989          | 43       |
|                                  | 60-69             | 79                 | 69              | 16              | <1%             | 4,888           | 146                        | 1,186                      | 978                        | 29                         | 0                          | 2,339         | 388                        | 574            | 32       |



|                                  |                   | Vaccination uptake |                 |                 |                 | Number of lives |                            |                            |                            |                            |                            |               | Mortality rate per 100,000 |                |          |
|----------------------------------|-------------------|--------------------|-----------------|-----------------|-----------------|-----------------|----------------------------|----------------------------|----------------------------|----------------------------|----------------------------|---------------|----------------------------|----------------|----------|
| Countries, areas and territories | Age group (years) | VU <sub>2</sub>    | VU <sub>3</sub> | VU <sub>4</sub> | VU <sub>5</sub> | Reported deaths | Saved after d <sub>1</sub> | Saved after d <sub>2</sub> | Saved after d <sub>3</sub> | Saved after d <sub>4</sub> | Saved after d <sub>5</sub> | Total averted | Reported                   | Total Expected | % change |
|                                  | 70-79             | 86                 | 77              | 27              | <1%             | 11,788          | 441                        | 2,971                      | 4,295                      | 227                        | 0                          | 7,934         | 1,114                      | 1,864          | 40       |
|                                  | 80+               | 87                 | 75              | 30              | <1%             | 14,595          | 706                        | 4,779                      | 7,581                      | 464                        | 0                          | 13,530        | 3,235                      | 6,234          | 48       |
| Denmark                          | 25-49             | 84                 | 63              | 5               | <1%             | 130             | 0                          | 62                         | 92                         | 0                          | 0                          | 154           | 7                          | 15             | 53       |
|                                  | 50-59             | 93                 | 87              | 58              | 1               | 217             | 0                          | 116                        | 255                        | 38                         | 0                          | 409           | 27                         | 78             | 65       |
|                                  | 60+               | 99                 | 97              | 86              | 2               | 6,772           | 0                          | 1,518                      | 10,045                     | 3,004                      | 70                         | 14,637        | 438                        | 1,384          | 68       |
|                                  | 60-69             | 97                 | 94              | 79              | 1               | 656             | 0                          | 268                        | 923                        | 246                        | 0                          | 1,437         | 97                         | 311            | 69       |
|                                  | 70-79             | 98                 | 97              | 89              | 3               | 1,823           | 0                          | 493                        | 2,680                      | 785                        | 24                         | 3,982         | 314                        | 999            | 69       |
|                                  | 80+               | 100                | 100             | 96              | 3               | 4,293           | 0                          | 757                        | 6,442                      | 1,973                      | 46                         | 9,218         | 1,473                      | 4,635          | 68       |
|                                  | 80+               | 100                | 100             | 96              | 3               | 4,293           | 0                          | 757                        | 6,442                      | 1,973                      | 46                         | 9,218         | 1,473                      | 4,635          | 68       |
| Estonia                          | 25-49             | 57                 | 34              | 5               | <1%             | 59              | 0                          | 14                         | 4                          | 0                          | 0                          | 18            | 13                         | 17             | 24       |
|                                  | 50-59             | 67                 | 46              | 8               | <1%             | 107             | 0                          | 31                         | 21                         | 0                          | 0                          | 52            | 61                         | 91             | 33       |
|                                  | 60+               | 77                 | 60              | 19              | 1               | 2,467           | 120                        | 1,009                      | 1,171                      | 116                        | 0                          | 2,416         | 677                        | 1,341          | 50       |
|                                  | 60-69             | 72                 | 54              | 15              | 1               | 330             | 5                          | 97                         | 89                         | 0                          | 0                          | 191           | 196                        | 310            | 37       |
|                                  | 70-79             | 80                 | 65              | 22              | 1               | 633             | 23                         | 245                        | 264                        | 23                         | 0                          | 555           | 546                        | 1,026          | 47       |
|                                  | 80+               | 82                 | 64              | 23              | 1               | 1,504           | 92                         | 667                        | 818                        | 93                         | 0                          | 1,670         | 1,876                      | 3,958          | 53       |
| Finland                          | 25-49             | 83                 | 52              | 3               | <1%             | 157             | 4                          | 100                        | 97                         | 0                          | 0                          | 201           | 9                          | 20             | 55       |

|                                  |                   | Vaccination uptake |                 |                 |                 | Number of lives |                            |                            |                            |                            |                            |               | Mortality rate per 100,000 |                |          |
|----------------------------------|-------------------|--------------------|-----------------|-----------------|-----------------|-----------------|----------------------------|----------------------------|----------------------------|----------------------------|----------------------------|---------------|----------------------------|----------------|----------|
| Countries, areas and territories | Age group (years) | VU <sub>2</sub>    | VU <sub>3</sub> | VU <sub>4</sub> | VU <sub>5</sub> | Reported deaths | Saved after d <sub>1</sub> | Saved after d <sub>2</sub> | Saved after d <sub>3</sub> | Saved after d <sub>4</sub> | Saved after d <sub>5</sub> | Total averted | Reported                   | Total Expected | % change |
|                                  | 50-59             | 92                 | 77              | 11              | 2               | 226             | 3                          | 117                        | 255                        | 7                          | 0                          | 382           | 32                         | 86             | 63       |
|                                  | 60+               | 94                 | 89              | 68              | 32              | 8,125           | 155                        | 2,100                      | 7,258                      | 5,851                      | 1,592                      | 16,956        | 497                        | 1,535          | 68       |
|                                  | 60-69             | 94                 | 87              | 54              | 15              | 647             | 12                         | 285                        | 786                        | 212                        | 32                         | 1,327         | 91                         | 278            | 67       |
|                                  | 70-79             | 96                 | 92              | 79              | 41              | 1,895           | 45                         | 608                        | 2,180                      | 1,098                      | 356                        | 4,287         | 319                        | 1,040          | 69       |
|                                  | 80+               | 92                 | 91              | 81              | 49              | 5,583           | 98                         | 1,207                      | 4,292                      | 4,541                      | 1,204                      | 11,342        | 1,688                      | 5,118          | 67       |
|                                  | 25-49             | 89                 | 68              | 4               | <1%             | 1,730           | 171                        | 740                        | 1,192                      | 3                          | 0                          | 2,106         | 8                          | 19             | 58       |
|                                  | 50-59             | 91                 | 80              | 13              | 1               | 3,998           | 304                        | 1,316                      | 3,199                      | 116                        | 0                          | 4,935         | 45                         | 100            | 55       |
| France                           | 60+               | 90                 | 83              | 44              | 11              | 93,100          | 4,008                      | 24,119                     | 62,470                     | 12,524                     | 1,505                      | 104,626       | 506                        | 1,074          | 53       |
|                                  | 60-69             | 91                 | 84              | 38              | 8               | 11,431          | 690                        | 3,239                      | 8,453                      | 973                        | 69                         | 13,424        | 141                        | 307            | 54       |
|                                  | 70-79             | 90                 | 85              | 49              | 13              | 22,785          | 1,036                      | 6,935                      | 16,537                     | 2,854                      | 286                        | 27,648        | 366                        | 809            | 55       |
|                                  | 80+               | 88                 | 80              | 49              | 16              | 58,884          | 2,282                      | 13,945                     | 37,480                     | 8,697                      | 1,150                      | 63,554        | 1,441                      | 2,997          | 52       |
| Germany                          | 60+               | 90                 | 85              | 39              | 8               | 135,420         | 2,632                      | 47,891                     | 82,445                     | 17,067                     | 4,422                      | 154,457       | 554                        | 1,187          | 53       |
|                                  | 25-49             | 70                 | 60              | 2               | <1%             | 843             | 95                         | 354                        | 220                        | 0                          | 0                          | 669           | 25                         | 45             | 44       |
| Greece                           | 50-59             | 77                 | 70              | 7               | 1               | 1,939           | 130                        | 843                        | 752                        | 0                          | 0                          | 1,725         | 126                        | 237            | 47       |
|                                  | 60+               | 88                 | 80              | 27              | 6               | 30,663          | 1,878                      | 12,764                     | 23,473                     | 3,092                      | 360                        | 41,567        | 999                        | 2,353          | 58       |

|                                  |                   | Vaccination uptake |                 |                 |                 | Number of lives |                            |                            |                            |                            |                            |               | Mortality rate per 100,000 |                |          |
|----------------------------------|-------------------|--------------------|-----------------|-----------------|-----------------|-----------------|----------------------------|----------------------------|----------------------------|----------------------------|----------------------------|---------------|----------------------------|----------------|----------|
| Countries, areas and territories | Age group (years) | VU <sub>2</sub>    | VU <sub>3</sub> | VU <sub>4</sub> | VU <sub>5</sub> | Reported deaths | Saved after d <sub>1</sub> | Saved after d <sub>2</sub> | Saved after d <sub>3</sub> | Saved after d <sub>4</sub> | Saved after d <sub>5</sub> | Total averted | Reported                   | Total Expected | % change |
|                                  | 60-69             | 86                 | 78              | 21              | 4               | 4,613           | 330                        | 2,157                      | 2,665                      | 136                        | 14                         | 5,302         | 349                        | 750            | 53       |
|                                  | 70-79             | 91                 | 84              | 33              | 8               | 7,969           | 264                        | 3,408                      | 6,174                      | 706                        | 84                         | 10,636        | 802                        | 1,872          | 57       |
|                                  | 80+               | 87                 | 77              | 30              | 7               | 18,081          | 1,284                      | 7,199                      | 14,634                     | 2,250                      | 262                        | 25,629        | 2,398                      | 5,796          | 59       |
| Hungary                          | 25-49             | 63                 | 36              | 1               | <1%             | 1,798           | 66                         | 525                        | 254                        | 0                          | 0                          | 845           | 52                         | 77             | 32       |
|                                  | 50-59             | 70                 | 50              | 3               | <1%             | 3,423           | 112                        | 924                        | 894                        | 0                          | 0                          | 1,930         | 270                        | 422            | 36       |
|                                  | 60+               | 81                 | 68              | 13              | <1%             | 36,007          | 761                        | 7,237                      | 19,113                     | 1,137                      | 0                          | 28,248        | 1,401                      | 2,500          | 44       |
|                                  | 60-69             | 81                 | 65              | 9               | <1%             | 8,408           | 242                        | 2,110                      | 3,893                      | 107                        | 0                          | 6,352         | 678                        | 1,190          | 43       |
|                                  | 70-79             | 84                 | 74              | 17              | 1               | 12,262          | 244                        | 2,563                      | 7,782                      | 450                        | 0                          | 11,039        | 1,385                      | 2,632          | 47       |
|                                  | 80+               | 75                 | 64              | 15              | 1               | 15,337          | 275                        | 2,564                      | 7,438                      | 580                        | 0                          | 10,857        | 3,444                      | 5,882          | 41       |
| Iceland                          | 25-49             | 57                 | 81              | 4               | <1%             | 1               | 0                          | 0                          | 3                          | 0                          | 0                          | 3             | 1                          | 3              | 67       |
|                                  | 50-59             | 84                 | 90              | 13              | 1               | 6               | 0                          | 0                          | 10                         | 0                          | 0                          | 10            | 14                         | 36             | 61       |
|                                  | 60+               | 96                 | 93              | 68              | 21              | 228             | 0                          | 6                          | 385                        | 107                        | 1                          | 499           | 295                        | 940            | 69       |
|                                  | 60-69             | 93                 | 91              | 58              | 13              | 13              | 0                          | 0                          | 23                         | 2                          | 0                          | 25            | 33                         | 98             | 66       |
|                                  | 70-79             | 97                 | 94              | 76              | 28              | 56              | 0                          | 6                          | 101                        | 27                         | 0                          | 134           | 221                        | 751            | 71       |
|                                  | 80+               | 100                | 94              | 84              | 32              | 159             | 0                          | 0                          | 261                        | 78                         | 1                          | 340           | 1,215                      | 3,812          | 68       |

|                                  |                   | Vaccination uptake |                 |                 |                 | Number of lives |                            |                            |                            |                            |                            |               | Mortality rate per 100,000 |                |          |
|----------------------------------|-------------------|--------------------|-----------------|-----------------|-----------------|-----------------|----------------------------|----------------------------|----------------------------|----------------------------|----------------------------|---------------|----------------------------|----------------|----------|
| Countries, areas and territories | Age group (years) | VU <sub>2</sub>    | VU <sub>3</sub> | VU <sub>4</sub> | VU <sub>5</sub> | Reported deaths | Saved after d <sub>1</sub> | Saved after d <sub>2</sub> | Saved after d <sub>3</sub> | Saved after d <sub>4</sub> | Saved after d <sub>5</sub> | Total averted | Reported                   | Total Expected | % change |
| Ireland                          | 25-49             | 85                 | 65              | 12              | <1%             | 143             | 2                          | 81                         | 70                         | 0                          | 0                          | 153           | 8                          | 17             | 53       |
|                                  | 50-59             | 87                 | 87              | 39              | 2               | 239             | 49                         | 174                        | 202                        | 21                         | 0                          | 446           | 38                         | 109            | 65       |
|                                  | 60+               | 100                | 100             | 76              | 38              | 5,620           | 62                         | 2,036                      | 3,537                      | 1,542                      | 782                        | 7,959         | 545                        | 1,317          | 59       |
|                                  | 60-69             | 95                 | 91              | 60              | 19              | 638             | 23                         | 494                        | 407                        | 119                        | 27                         | 1,070         | 127                        | 339            | 63       |
|                                  | 70-79             | 100                | 100             | 87              | 55              | 1,448           | 24                         | 869                        | 1,013                      | 455                        | 209                        | 2,570         | 418                        | 1,161          | 64       |
|                                  | 80+               | 100                | 100             | 95              | 60              | 3,534           | 15                         | 673                        | 2,117                      | 968                        | 546                        | 4,319         | 1,943                      | 4,317          | 55       |
| Israel                           | 25-49             | 89                 | 66              | 4               | <1%             | 270             | 19                         | 174                        | 193                        | 0                          | 0                          | 386           | 10                         | 24             | 58       |
|                                  | 50-59             | 95                 | 81              | 10              | <1%             | 458             | 41                         | 374                        | 579                        | 10                         | 0                          | 1,004         | 58                         | 184            | 68       |
|                                  | 60+               | 100                | 100             | 57              | 1               | 8,669           | 0                          | 5,591                      | 13,437                     | 5,809                      | 20                         | 24,857        | 667                        | 2,579          | 74       |
| Italy                            | 25-49             | 85                 | 81              | 3               | <1%             | 1,801           | 148                        | 486                        | 1,058                      | 0                          | 0                          | 1,692         | 10                         | 19             | 47       |
|                                  | 50-59             | 85                 | 87              | 6               | <1%             | 4,795           | 432                        | 1,118                      | 2,881                      | 33                         | 0                          | 4,464         | 50                         | 97             | 48       |
|                                  | 60+               | 90                 | 92              | 31              | 3               | 124,987         | 7,676                      | 31,039                     | 106,230                    | 19,933                     | 842                        | 165,720       | 690                        | 1,606          | 57       |
|                                  | 60-69             | 85                 | 91              | 21              | 1               | 12,880          | 1,081                      | 2,533                      | 7,915                      | 479                        | 15                         | 12,023        | 170                        | 329            | 48       |
|                                  | 70-79             | 90                 | 93              | 33              | 2               | 30,768          | 2,227                      | 5,617                      | 22,140                     | 2,384                      | 64                         | 32,432        | 511                        | 1,050          | 51       |
|                                  | 80+               | 96                 | 93              | 46              | 6               | 81,339          | 4,368                      | 22,889                     | 76,175                     | 17,070                     | 763                        | 121,265       | 1,805                      | 4,497          | 60       |

|                                  |                   | Vaccination uptake |                 |                 |                 | Number of lives |                            |                            |                            |                            |                            |               | Mortality rate per 100,000 |                |          |
|----------------------------------|-------------------|--------------------|-----------------|-----------------|-----------------|-----------------|----------------------------|----------------------------|----------------------------|----------------------------|----------------------------|---------------|----------------------------|----------------|----------|
| Countries, areas and territories | Age group (years) | VU <sub>2</sub>    | VU <sub>3</sub> | VU <sub>4</sub> | VU <sub>5</sub> | Reported deaths | Saved after d <sub>1</sub> | Saved after d <sub>2</sub> | Saved after d <sub>3</sub> | Saved after d <sub>4</sub> | Saved after d <sub>5</sub> | Total averted | Reported                   | Total Expected | % change |
| Latvia                           | 25-49             | 61                 | 32              | 2               | <1%             | 222             | 46                         | 93                         | 27                         | 0                          | 0                          | 166           | 36                         | 63             | 43       |
|                                  | 50-59             | 62                 | 36              | 3               | <1%             | 415             | 79                         | 159                        | 56                         | 0                          | 0                          | 294           | 161                        | 275            | 41       |
|                                  | 60+               | 63                 | 43              | 9               | 2               | 5,022           | 601                        | 1,533                      | 1,022                      | 5                          | 0                          | 3,161         | 954                        | 1,554          | 39       |
|                                  | 60-69             | 65                 | 42              | 6               | 1               | 936             | 146                        | 393                        | 170                        | 0                          | 0                          | 709           | 379                        | 666            | 43       |
|                                  | 70-79             | 67                 | 48              | 11              | 3               | 1,481           | 180                        | 553                        | 361                        | 0                          | 0                          | 1,094         | 892                        | 1,551          | 42       |
|                                  | 80+               | 54                 | 39              | 10              | 3               | 2,605           | 275                        | 587                        | 491                        | 5                          | 0                          | 1,358         | 2,298                      | 3,496          | 34       |
| Lithuania                        | 25-49             | 63                 | 32              | 1               | <1%             | 291             | 56                         | 194                        | 19                         | 0                          | 0                          | 269           | 32                         | 61             | 48       |
|                                  | 50-59             | 67                 | 37              | 1               | <1%             | 512             | 72                         | 325                        | 32                         | 0                          | 0                          | 429           | 122                        | 225            | 46       |
|                                  | 60+               | 71                 | 51              | 3               | <1%             | 7,392           | 391                        | 3,620                      | 1,580                      | 0                          | 0                          | 5,591         | 949                        | 1,667          | 43       |
|                                  | 60-69             | 72                 | 47              | 2               | <1%             | 1,155           | 110                        | 786                        | 173                        | 0                          | 0                          | 1,069         | 304                        | 586            | 48       |
|                                  | 70-79             | 75                 | 57              | 4               | <1%             | 2,167           | 127                        | 1,394                      | 536                        | 0                          | 0                          | 2,057         | 900                        | 1,754          | 49       |
|                                  | 80+               | 64                 | 49              | 5               | <1%             | 4,070           | 154                        | 1,440                      | 871                        | 0                          | 0                          | 2,465         | 2,575                      | 4,135          | 38       |
| Luxembourg                       | 25-49             | 68                 | 59              | 3               | <1%             | 13              | 0                          | 0                          | 0                          | 0                          | 0                          | 0             | 5                          | 5              | 0        |
|                                  | 50-59             | 74                 | 74              | 7               | <1%             | 35              | 0                          | 10                         | 21                         | 0                          | 0                          | 31            | 38                         | 72             | 47       |
|                                  | 60+               | 86                 | 83              | 48              | 1               | 706             | 14                         | 222                        | 665                        | 132                        | 0                          | 1,033         | 535                        | 1,318          | 59       |

|                                  |                   | Vaccination uptake |                 |                 |                 | Number of lives |                            |                            |                            |                            |                            |               | Mortality rate per 100,000 |                |          |
|----------------------------------|-------------------|--------------------|-----------------|-----------------|-----------------|-----------------|----------------------------|----------------------------|----------------------------|----------------------------|----------------------------|---------------|----------------------------|----------------|----------|
| Countries, areas and territories | Age group (years) | VU <sub>2</sub>    | VU <sub>3</sub> | VU <sub>4</sub> | VU <sub>5</sub> | Reported deaths | Saved after d <sub>1</sub> | Saved after d <sub>2</sub> | Saved after d <sub>3</sub> | Saved after d <sub>4</sub> | Saved after d <sub>5</sub> | Total averted | Reported                   | Total Expected | % change |
|                                  | 60-69             | 80                 | 80              | 39              | 1               | 85              | 0                          | 21                         | 50                         | 8                          | 0                          | 79            | 129                        | 248            | 48       |
|                                  | 70-79             | 87                 | 84              | 53              | <1%             | 148             | 3                          | 35                         | 94                         | 13                         | 0                          | 145           | 365                        | 723            | 50       |
|                                  | 80+               | 97                 | 90              | 63              | 1               | 473             | 11                         | 166                        | 521                        | 111                        | 0                          | 809           | 1,862                      | 5,046          | 63       |
| Malta                            | 25-49             | 82                 | 78              | 1               | <1%             | 14              | 0                          | 6                          | 24                         | 0                          | 0                          | 30            | 7                          | 21             | 67       |
|                                  | 50-59             | 86                 | 89              | 4               | <1%             | 10              | 0                          | 0                          | 18                         | 0                          | 0                          | 18            | 17                         | 48             | 65       |
|                                  | 60+               | 97                 | 87              | 44              | 5               | 480             | 0                          | 314                        | 599                        | 186                        | 0                          | 1,099         | 372                        | 1,225          | 70       |
|                                  | 60-69             | 93                 | 95              | 26              | 3               | 68              | 0                          | 49                         | 103                        | 1                          | 0                          | 153           | 114                        | 370            | 69       |
|                                  | 70-79             | 98                 | 80              | 50              | 6               | 138             | 0                          | 92                         | 181                        | 38                         | 0                          | 311           | 289                        | 941            | 69       |
|                                  | 80+               | 100                | 83              | 82              | 9               | 274             | 0                          | 173                        | 315                        | 147                        | 0                          | 635           | 1,276                      | 4,234          | 70       |
|                                  | 80+               | 100                | 83              | 82              | 9               | 274             | 0                          | 173                        | 315                        | 147                        | 0                          | 635           | 1,276                      | 4,234          | 70       |
| Netherlands (Kingdom of)         | 25-49             | 63                 | 50              | 9               | <1%             | 137             | 5                          | 50                         | 18                         | 0                          | 0                          | 73            | 2                          | 4              | 50       |
|                                  | 50-59             | 70                 | 70              | 23              | 1               | 352             | 51                         | 131                        | 91                         | 0                          | 0                          | 273           | 14                         | 25             | 44       |
|                                  | 60+               | 94                 | 93              | 70              | 46              | 12,501          | 286                        | 11,752                     | 3,122                      | 1,327                      | 422                        | 16,909        | 267                        | 628            | 57       |
|                                  | 60-69             | 89                 | 87              | 57              | 29              | 1,091           | 97                         | 830                        | 285                        | 59                         | 10                         | 1,281         | 50                         | 109            | 54       |
|                                  | 70-79             | 97                 | 96              | 80              | 59              | 3,150           | 99                         | 2,991                      | 734                        | 297                        | 90                         | 4,211         | 190                        | 445            | 57       |
|                                  | 80+               | 100                | 100             | 86              | 65              | 8,260           | 90                         | 7,931                      | 2,103                      | 971                        | 322                        | 11,417        | 968                        | 2,307          | 58       |

|                                  |                   | Vaccination uptake |                 |                 |                 | Number of lives |                            |                            |                            |                            |                            |               | Mortality rate per 100,000 |                |          |
|----------------------------------|-------------------|--------------------|-----------------|-----------------|-----------------|-----------------|----------------------------|----------------------------|----------------------------|----------------------------|----------------------------|---------------|----------------------------|----------------|----------|
| Countries, areas and territories | Age group (years) | VU <sub>2</sub>    | VU <sub>3</sub> | VU <sub>4</sub> | VU <sub>5</sub> | Reported deaths | Saved after d <sub>1</sub> | Saved after d <sub>2</sub> | Saved after d <sub>3</sub> | Saved after d <sub>4</sub> | Saved after d <sub>5</sub> | Total averted | Reported                   | Total Expected | % change |
| North Macedonia                  | 25-49             | 51                 | 5               | 0               | <1%             | 396             | 0                          | 92                         | 0                          | 0                          | 0                          | 92            | 64                         | 79             | 19       |
|                                  | 50-59             | 61                 | 10              | 0               | <1%             | 714             | 0                          | 212                        | 7                          | 0                          | 0                          | 219           | 282                        | 368            | 23       |
|                                  | 60+               | 66                 | 24              | 2               | <1%             | 6,482           | 87                         | 2,364                      | 459                        | 0                          | 0                          | 2,910         | 1,473                      | 2,134          | 31       |
|                                  | 60-69             | 68                 | 23              | 1               | <1%             | 1,947           | 6                          | 712                        | 113                        | 0                          | 0                          | 831           | 815                        | 1,162          | 30       |
|                                  | 70-79             | 69                 | 29              | 3               | <1%             | 2,647           | 36                         | 1,090                      | 247                        | 0                          | 0                          | 1,373         | 1,825                      | 2,771          | 34       |
|                                  | 80+               | 51                 | 18              | 2               | <1%             | 1,888           | 45                         | 562                        | 99                         | 0                          | 0                          | 706           | 3,366                      | 4,625          | 27       |
| Portugal                         | 25-49             | 76                 | 70              | 7               | <1%             | 297             | 92                         | 123                        | 140                        | 0                          | 0                          | 355           | 9                          | 20             | 55       |
|                                  | 50-59             | 78                 | 88              | 43              | <1%             | 611             | 162                        | 225                        | 388                        | 27                         | 0                          | 802           | 41                         | 94             | 56       |
|                                  | 60+               | 89                 | 92              | 70              | 12              | 20,439          | 1,773                      | 4,870                      | 14,560                     | 3,241                      | 1,443                      | 25,887        | 638                        | 1,445          | 56       |
|                                  | 60-69             | 87                 | 92              | 61              | 1               | 1,826           | 247                        | 607                        | 1,173                      | 112                        | 0                          | 2,139         | 132                        | 286            | 54       |
|                                  | 70-79             | 90                 | 92              | 74              | 1               | 4,467           | 341                        | 1,272                      | 3,249                      | 441                        | 1                          | 5,304         | 407                        | 890            | 54       |
|                                  | 80+               | 90                 | 93              | 82              | 51              | 14,146          | 1,185                      | 2,991                      | 10,138                     | 2,688                      | 1,442                      | 18,444        | 1,953                      | 4,500          | 57       |
| Republic of Moldova              | 60+               | 39                 | 22              | 2               | <1%             | 5,983           | 272                        | 1,156                      | 243                        | 0                          | 0                          | 1,671         | 844                        | 1,080          | 22       |
| Romania                          | 25-49             | 37                 | 10              | 0               | <1%             | 2,283           | 144                        | 454                        | 20                         | 0                          | 0                          | 618           | 36                         | 46             | 22       |
|                                  | 50-59             | 40                 | 13              | 0               | <1%             | 4,344           | 239                        | 1,042                      | 69                         | 0                          | 0                          | 1,350         | 162                        | 213            | 24       |

|                                  |                   | Vaccination uptake |                 |                 |                 | Number of lives |                            |                            |                            |                            |                            |               | Mortality rate per 100,000 |                |          |
|----------------------------------|-------------------|--------------------|-----------------|-----------------|-----------------|-----------------|----------------------------|----------------------------|----------------------------|----------------------------|----------------------------|---------------|----------------------------|----------------|----------|
| Countries, areas and territories | Age group (years) | VU <sub>2</sub>    | VU <sub>3</sub> | VU <sub>4</sub> | VU <sub>5</sub> | Reported deaths | Saved after d <sub>1</sub> | Saved after d <sub>2</sub> | Saved after d <sub>3</sub> | Saved after d <sub>4</sub> | Saved after d <sub>5</sub> | Total averted | Reported                   | Total Expected | % change |
|                                  | 60+               | 40                 | 14              | 0               | <1%             | 44,517          | 1,092                      | 8,644                      | 924                        | 0                          | 0                          | 10,660        | 904                        | 1,121          | 19       |
|                                  | 60-69             | 45                 | 15              | 0               | <1%             | 12,296          | 442                        | 3,203                      | 278                        | 0                          | 0                          | 3,923         | 496                        | 655            | 24       |
|                                  | 70-79             | 41                 | 14              | 0               | <1%             | 17,028          | 432                        | 3,807                      | 399                        | 0                          | 0                          | 4,638         | 1,065                      | 1,355          | 21       |
|                                  | 80+               | 26                 | 9               | 0               | <1%             | 15,193          | 218                        | 1,634                      | 247                        | 0                          | 0                          | 2,099         | 1,794                      | 2,042          | 12       |
| Slovakia                         | 25-49             | 50                 | 27              | 1               | <1%             | 659             | 12                         | 135                        | 25                         | 0                          | 0                          | 172           | 32                         | 41             | 22       |
|                                  | 50-59             | 59                 | 38              | 2               | <1%             | 1,365           | 35                         | 339                        | 95                         | 0                          | 0                          | 469           | 194                        | 261            | 26       |
|                                  | 60+               | 68                 | 59              | 4               | <1%             | 15,744          | 151                        | 3,034                      | 3,348                      | 0                          | 0                          | 6,533         | 1,218                      | 1,723          | 29       |
|                                  | 60-69             | 69                 | 59              | 3               | <1%             | 4,073           | 74                         | 945                        | 653                        | 0                          | 0                          | 1,672         | 593                        | 837            | 29       |
|                                  | 70-79             | 71                 | 64              | 5               | <1%             | 5,787           | 37                         | 1,251                      | 1,491                      | 0                          | 0                          | 2,779         | 1,368                      | 2,026          | 32       |
|                                  | 80+               | 59                 | 53              | 5               | <1%             | 5,884           | 40                         | 838                        | 1,204                      | 0                          | 0                          | 2,082         | 3,204                      | 4,337          | 26       |
| Slovenia                         | 25-49             | 47                 | 23              | 1               | <1%             | 96              | 4                          | 17                         | 5                          | 0                          | 0                          | 26            | 14                         | 17             | 18       |
|                                  | 50-59             | 63                 | 40              | 2               | <1%             | 243             | 18                         | 78                         | 57                         | 0                          | 0                          | 153           | 81                         | 132            | 39       |
|                                  | 60+               | 73                 | 58              | 11              | 3               | 6,913           | 182                        | 1,822                      | 2,898                      | 128                        | 44                         | 5,074         | 1,175                      | 2,038          | 42       |
|                                  | 60-69             | 72                 | 54              | 7               | 1               | 830             | 45                         | 278                        | 330                        | 5                          | 0                          | 658           | 294                        | 528            | 44       |
|                                  | 70-79             | 78                 | 64              | 13              | 4               | 1,582           | 57                         | 512                        | 820                        | 29                         | 8                          | 1,426         | 838                        | 1,593          | 47       |



|                                  |                   | Vaccination uptake |                 |                 |                 | Number of lives |                            |                            |                            |                            |                            |               | Mortality rate per 100,000 |                |          |
|----------------------------------|-------------------|--------------------|-----------------|-----------------|-----------------|-----------------|----------------------------|----------------------------|----------------------------|----------------------------|----------------------------|---------------|----------------------------|----------------|----------|
| Countries, areas and territories | Age group (years) | VU <sub>2</sub>    | VU <sub>3</sub> | VU <sub>4</sub> | VU <sub>5</sub> | Reported deaths | Saved after d <sub>1</sub> | Saved after d <sub>2</sub> | Saved after d <sub>3</sub> | Saved after d <sub>4</sub> | Saved after d <sub>5</sub> | Total averted | Reported                   | Total Expected | % change |
|                                  | 80+               | 69                 | 56              | 16              | 4               | 4,501           | 80                         | 1,032                      | 1,748                      | 94                         | 36                         | 2,990         | 3,829                      | 6,373          | 40       |
| Spain                            | 25-49             | 75                 | 52              | 5               | <1%             | 1,160           | 196                        | 564                        | 296                        | 0                          | 0                          | 1,056         | 7                          | 14             | 50       |
|                                  | 50-59             | 79                 | 76              | 13              | <1%             | 2,771           | 548                        | 1,488                      | 1,353                      | 17                         | 0                          | 3,406         | 38                         | 85             | 55       |
|                                  | 60+               | 92                 | 91              | 60              | <1%             | 66,327          | 2,073                      | 43,711                     | 67,669                     | 6,274                      | 9                          | 119,736       | 526                        | 1,474          | 64       |
|                                  | 60-69             | 86                 | 89              | 47              | <1%             | 7,324           | 1,056                      | 3,041                      | 5,234                      | 248                        | 0                          | 9,579         | 130                        | 299            | 57       |
|                                  | 70-79             | 93                 | 92              | 67              | <1%             | 14,632          | 1,008                      | 7,690                      | 13,364                     | 1,014                      | 0                          | 23,076        | 358                        | 922            | 61       |
|                                  | 80+               | 100                | 93              | 76              | <1%             | 44,371          | 9                          | 32,980                     | 49,071                     | 5,012                      | 9                          | 87,081        | 1,539                      | 4,559          | 66       |
| Sweden                           | 25-49             | 81                 | 53              | 12              | <1%             | 208             | 0                          | 67                         | 49                         | 1                          | 0                          | 117           | 6                          | 9              | 33       |
|                                  | 50-59             | 89                 | 75              | 31              | 1               | 392             | 2                          | 108                        | 187                        | 36                         | 0                          | 333           | 29                         | 54             | 46       |
|                                  | 60+               | 90                 | 86              | 73              | 3               | 15,509          | 148                        | 2,153                      | 6,224                      | 8,064                      | 173                        | 16,762        | 570                        | 1,185          | 52       |
|                                  | 60-69             | 91                 | 85              | 63              | 3               | 1,123           | 27                         | 263                        | 593                        | 340                        | 11                         | 1,234         | 100                        | 211            | 53       |
|                                  | 70-79             | 93                 | 90              | 82              | 4               | 3,783           | 83                         | 668                        | 1,980                      | 2,273                      | 78                         | 5,082         | 370                        | 867            | 57       |
|                                  | 80+               | 83                 | 82              | 77              | 2               | 10,603          | 38                         | 1,222                      | 3,651                      | 5,451                      | 84                         | 10,446        | 1,821                      | 3,615          | 50       |
| Switzerland                      | 25-49             | 69                 | 47              | 2               | <1%             | 91              | 0                          | 32                         | 14                         | 0                          | 0                          | 46            | 3                          | 5              | 40       |
|                                  | 50-59             | 76                 | 67              | 6               | <1%             | 265             | 7                          | 108                        | 69                         | 0                          | 0                          | 184           | 20                         | 35             | 43       |

|                                  |                   | Vaccination uptake |                 |                 |                 | Number of lives |                            |                            |                            |                            |                            |               | Mortality rate per 100,000 |                |          |
|----------------------------------|-------------------|--------------------|-----------------|-----------------|-----------------|-----------------|----------------------------|----------------------------|----------------------------|----------------------------|----------------------------|---------------|----------------------------|----------------|----------|
| Countries, areas and territories | Age group (years) | VU <sub>2</sub>    | VU <sub>3</sub> | VU <sub>4</sub> | VU <sub>5</sub> | Reported deaths | Saved after d <sub>1</sub> | Saved after d <sub>2</sub> | Saved after d <sub>3</sub> | Saved after d <sub>4</sub> | Saved after d <sub>5</sub> | Total averted | Reported                   | Total Expected | % change |
|                                  | 60+               | 85                 | 100             | 24              | 5               | 8,325           | 216                        | 2,874                      | 4,572                      | 281                        | 81                         | 8,024         | 377                        | 741            | 49       |
|                                  | 60-69             | 81                 | 90              | 13              | 1               | 707             | 19                         | 275                        | 255                        | 1                          | 0                          | 550           | 71                         | 127            | 44       |
|                                  | 70-79             | 88                 | 100             | 29              | 7               | 1,744           | 33                         | 582                        | 937                        | 65                         | 10                         | 1,627         | 234                        | 453            | 48       |
|                                  | 80+               | 90                 | 100             | 38              | 10              | 5,874           | 164                        | 2,017                      | 3,380                      | 215                        | 71                         | 5,847         | 1,245                      | 2,483          | 50       |
| Ukraine                          | 60+               | 38                 | 55              | 27              | <1%             | 82,115          | 795                        | 11,074                     | 984                        | 817                        | 0                          | 13,670        | 897                        | 1,046          | 14       |
| United Kingdom (England)         | 25-49             | 83                 | 61              | 6               | <1%             | 5,239           | 512                        | 2,666                      | 2,145                      | 250                        | 0                          | 5,573         | 28                         | 58             | 52       |
|                                  | 50-59             | 93                 | 82              | 51              | <1%             | 9,011           | 528                        | 5,573                      | 6,180                      | 1,006                      | 0                          | 13,287        | 117                        | 289            | 60       |
|                                  | 60+               | 100                | 96              | 62              | 48              | 160,550         | 18,441                     | 67,687                     | 138,466                    | 49,662                     | 64,874                     | 339,130       | 1,168                      | 3,634          | 68       |
|                                  | 60-69             | 100                | 94              | 74              | <1%             | 18,739          | 899                        | 13,585                     | 17,615                     | 4,859                      | 0                          | 36,958        | 309                        | 919            | 66       |
|                                  | 70-79             | 99                 | 97              | 34              | 86              | 39,577          | 3,297                      | 18,225                     | 38,342                     | 4,949                      | 16,370                     | 81,183        | 812                        | 2,477          | 67       |
|                                  | 80+               | 100                | 99              | 86              | 88              | 102,234         | 14,245                     | 35,877                     | 82,509                     | 39,854                     | 48,504                     | 220,989       | 3,630                      | 11,476         | 68       |
| United Kingdom (Scotland)        | 25-49             | 82                 | 66              | 14              | 1               | 307             | 34                         | 214                        | 149                        | 0                          | 0                          | 397           | 17                         | 39             | 56       |
|                                  | 50-59             | 95                 | 88              | 57              | 3               | 561             | 27                         | 577                        | 428                        | 51                         | 0                          | 1,083         | 71                         | 208            | 66       |
|                                  | 60+               | 100                | 100             | 91              | 33              | 9,659           | 272                        | 5,401                      | 10,105                     | 3,540                      | 1,340                      | 20,658        | 673                        | 2,113          | 68       |

|                                  |                   | Vaccination uptake |                 |                 |                 | Number of lives |                            |                            |                            |                            |                            |               | Mortality rate per 100,000 |                |          |
|----------------------------------|-------------------|--------------------|-----------------|-----------------|-----------------|-----------------|----------------------------|----------------------------|----------------------------|----------------------------|----------------------------|---------------|----------------------------|----------------|----------|
| Countries, areas and territories | Age group (years) | VU <sub>2</sub>    | VU <sub>3</sub> | VU <sub>4</sub> | VU <sub>5</sub> | Reported deaths | Saved after d <sub>1</sub> | Saved after d <sub>2</sub> | Saved after d <sub>3</sub> | Saved after d <sub>4</sub> | Saved after d <sub>5</sub> | Total averted | Reported                   | Total Expected | % change |
| Kosovo <sup>[1]</sup>            | 25-49             | 59                 | 5               | 0               | <1%             | 85              | 0                          | 8                          | 0                          | 0                          | 0                          | 8             | 14                         | 15             | 7        |
|                                  | 50-59             | 69                 | 10              | 0               | <1%             | 182             | 0                          | 31                         | 0                          | 0                          | 0                          | 31            | 93                         | 108            | 14       |
|                                  | 60+               | 71                 | 20              | 1               | <1%             | 1,432           | 10                         | 356                        | 27                         | 0                          | 0                          | 393           | 573                        | 730            | 22       |
|                                  | 60-69             | 74                 | 19              | 1               | <1%             | 401             | 0                          | 93                         | 6                          | 0                          | 0                          | 99            | 287                        | 358            | 20       |
|                                  | 70-79             | 75                 | 25              | 1               | <1%             | 607             | 5                          | 190                        | 16                         | 0                          | 0                          | 211           | 807                        | 1,087          | 26       |
|                                  | 80+               | 50                 | 14              | 1               | <1%             | 424             | 5                          | 73                         | 5                          | 0                          | 0                          | 83            | 1,209                      | 1,445          | 16       |
| Total                            | -                 | 83                 | 74              | 29              | 7               | 1,050,501       | 52,006                     | 355,807                    | 656,331                    | 150,837                    | 79,054                     | 1,294,035     | 243                        | 541            | 55       |

[1] All references to Kosovo in this document should be understood to be in the context of the United Nations Security Council resolution 1244 (1999).

Supplementary table 5: Regional summary of sensitivity analyses by age and variant, for all 34 countries, areas and territories (CAT) included in the analysis between weeks 50/2020 and 12/2023.

| Age group   | Scenario | Index             |                         |                   | Alpha             |                         |                   | Delta             |                         |                   | Omicron           |                         |                   | Total             |                         |                   |
|-------------|----------|-------------------|-------------------------|-------------------|-------------------|-------------------------|-------------------|-------------------|-------------------------|-------------------|-------------------|-------------------------|-------------------|-------------------|-------------------------|-------------------|
|             |          | Total lives saved | Mortality rate expected | Percentage change | Total lives saved | Mortality rate expected | Percentage change | Total lives saved | Mortality rate expected | Percentage change | Total lives saved | Mortality rate expected | Percentage change | Total lives saved | Mortality rate expected | Percentage change |
| 25-49 years | 1        | 0                 | 0                       | 0                 | 190               | 11                      | 4                 | 8,825             | 494                     | 60                | 15,655            | 877                     | 72                | 24,670            | 1,382                   | 56                |
|             | 2        | 0                 | 0                       | 0                 | 105               | 6                       | 2                 | 4,390             | 246                     | 43                | 5,181             | 290                     | 46                | 9,676             | 542                     | 33                |
|             | 3        | 0                 | 0                       | 0                 | 115               | 6                       | 3                 | 6,077             | 340                     | 51                | 9,264             | 519                     | 60                | 15,456            | 866                     | 44                |
|             | 4        | 0                 | 0                       | 0                 | 221               | 12                      | 5                 | 7,764             | 435                     | 57                | 10,273            | 576                     | 63                | 18,258            | 1,023                   | 48                |
|             | 5        | 0                 | 0                       | 0                 | 166               | 9                       | 4                 | 7,104             | 398                     | 55                | 10,732            | 601                     | 64                | 18,002            | 1,009                   | 48                |
|             | 6        | 0                 | 0                       | 0                 | 161               | 9                       | 4                 | 5,973             | 335                     | 51                | 7,599             | 426                     | 55                | 13,733            | 769                     | 41                |
|             | 7        | 0                 | 0                       | 0                 | 160               | 9                       | 4                 | 5,844             | 327                     | 50                | 7,271             | 407                     | 54                | 13,275            | 744                     | 40                |
|             | 8        | 0                 | 0                       | 0                 | 164               | 9                       | 4                 | 6,552             | 367                     | 53                | 9,058             | 507                     | 60                | 15,774            | 884                     | 45                |
| 50-59 years | 1        | 0                 | 0                       | 0                 | 1,000             | 126                     | 9                 | 25,928            | 3,277                   | 73                | 44,333            | 5,603                   | 79                | 71,261            | 9,007                   | 64                |
|             | 2        | 0                 | 0                       | 0                 | 537               | 68                      | 5                 | 10,451            | 1,321                   | 52                | 11,785            | 1,490                   | 49                | 22,773            | 2,878                   | 36                |
|             | 3        | 0                 | 0                       | 0                 | 609               | 77                      | 6                 | 15,829            | 2,001                   | 62                | 23,100            | 2,920                   | 66                | 39,538            | 4,997                   | 50                |
|             | 4        | 0                 | 0                       | 0                 | 1,126             | 142                     | 10                | 20,087            | 2,539                   | 68                | 25,357            | 3,205                   | 68                | 46,570            | 5,886                   | 54                |

|           |          | Index             |                         |                   | Alpha             |                         |                   | Delta             |                         |                   | Omicron           |                         |                   | Total             |                         |                   |
|-----------|----------|-------------------|-------------------------|-------------------|-------------------|-------------------------|-------------------|-------------------|-------------------------|-------------------|-------------------|-------------------------|-------------------|-------------------|-------------------------|-------------------|
| Age group | Scenario | Total lives saved | Mortality rate expected | Percentage change | Total lives saved | Mortality rate expected | Percentage change | Total lives saved | Mortality rate expected | Percentage change | Total lives saved | Mortality rate expected | Percentage change | Total lives saved | Mortality rate expected | Percentage change |
|           | 5        | 0                 | 0                       | 0                 | 830               | 105                     | 8                 | 18,800            | 2,376                   | 66                | 26,864            | 3,395                   | 69                | 46,494            | 5,876                   | 54                |
|           | 6        | 0                 | 0                       | 0                 | 780               | 99                      | 7                 | 14,582            | 1,843                   | 60                | 18,598            | 2,351                   | 61                | 33,960            | 4,292                   | 46                |
|           | 7        | 0                 | 0                       | 0                 | 782               | 99                      | 7                 | 14,672            | 1,854                   | 60                | 17,475            | 2,209                   | 59                | 32,929            | 4,162                   | 45                |
|           | 8        | 0                 | 0                       | 0                 | 807               | 102                     | 7                 | 16,780            | 2,121                   | 63                | 22,246            | 2,812                   | 65                | 39,833            | 5,034                   | 50                |
| 60+ years | 1        | 0                 | 0                       | 0                 | 76,172            | 554                     | 27                | 653,418           | 4,752                   | 78                | 1,792,564         | 13,038                  | 83                | 2,522,154         | 18,344                  | 72                |
|           | 2        | 0                 | 0                       | 0                 | 32,986            | 240                     | 14                | 226,148           | 1,645                   | 56                | 455,665           | 3,314                   | 55                | 714,799           | 5,199                   | 42                |
|           | 3        | 0                 | 0                       | 0                 | 39,106            | 284                     | 16                | 336,123           | 2,445                   | 65                | 893,370           | 6,498                   | 71                | 1,268,599         | 9,227                   | 56                |
|           | 4        | 0                 | 0                       | 0                 | 79,814            | 581                     | 27                | 464,228           | 3,376                   | 72                | 922,066           | 6,706                   | 71                | 1,466,108         | 10,663                  | 60                |
|           | 5        | 0                 | 0                       | 0                 | 56,712            | 412                     | 21                | 425,810           | 3,097                   | 70                | 1,007,454         | 7,327                   | 73                | 1,489,976         | 10,837                  | 60                |
|           | 6        | 0                 | 0                       | 0                 | 52,913            | 385                     | 20                | 299,125           | 2,176                   | 63                | 691,761           | 5,031                   | 65                | 1,043,799         | 7,592                   | 51                |
|           | 7        | 0                 | 0                       | 0                 | 52,191            | 380                     | 20                | 301,449           | 2,193                   | 63                | 628,686           | 4,573                   | 63                | 982,326           | 7,145                   | 50                |
|           | 8        | 0                 | 0                       | 0                 | 54,795            | 399                     | 21                | 360,041           | 2,619                   | 67                | 823,592           | 5,990                   | 69                | 1,238,428         | 9,007                   | 56                |
| Total     | 1        | 0                 | 0                       | 0                 | 77,362            | 474                     | 26                | 688,171           | 4,215                   | 78                | 1,852,552         | 11,348                  | 83                | 2,618,085         | 16,037                  | 71                |
|           | 2        | 0                 | 0                       | 0                 | 33,628            | 206                     | 13                | 240,989           | 1,476                   | 55                | 472,631           | 2,895                   | 55                | 747,248           | 4,577                   | 42                |

|           |          | Index             |                         |                   | Alpha             |                         |                   | Delta             |                         |                   | Omicron           |                         |                   | Total             |                         |                   |
|-----------|----------|-------------------|-------------------------|-------------------|-------------------|-------------------------|-------------------|-------------------|-------------------------|-------------------|-------------------|-------------------------|-------------------|-------------------|-------------------------|-------------------|
| Age group | Scenario | Total lives saved | Mortality rate expected | Percentage change | Total lives saved | Mortality rate expected | Percentage change | Total lives saved | Mortality rate expected | Percentage change | Total lives saved | Mortality rate expected | Percentage change | Total lives saved | Mortality rate expected | Percentage change |
|           | 3        | 0                 | 0                       | 0                 | 39,830            | 244                     | 15                | 358,029           | 2,193                   | 65                | 925,734           | 5,671                   | 70                | 1,323,593         | 8,108                   | 56                |
|           | 4        | 0                 | 0                       | 0                 | 81,161            | 497                     | 26                | 492,079           | 3,014                   | 72                | 957,696           | 5,866                   | 71                | 1,530,936         | 9,378                   | 59                |
|           | 5        | 0                 | 0                       | 0                 | 57,708            | 353                     | 20                | 451,714           | 2,767                   | 70                | 1,045,050         | 6,401                   | 73                | 1,554,472         | 9,522                   | 60                |
|           | 6        | 0                 | 0                       | 0                 | 53,854            | 330                     | 19                | 319,680           | 1,958                   | 62                | 717,958           | 4,398                   | 65                | 1,091,492         | 6,686                   | 51                |
|           | 7        | 0                 | 0                       | 0                 | 53,133            | 325                     | 19                | 321,965           | 1,972                   | 62                | 653,432           | 4,003                   | 63                | 1,028,530         | 6,300                   | 49                |
|           | 8        | 0                 | 0                       | 0                 | 55,766            | 342                     | 20                | 383,373           | 2,348                   | 66                | 854,896           | 5,237                   | 69                | 1,294,035         | 7,927                   | 55                |

Scenario descriptions: 1: High VE values; 2: Low VE values; 3: Long lag time; 4: Short lag time; 5: Long vaccine waning time; 6: Short vaccine waning time; 7: High prior immunity; 8: Low prior immunity

Supplementary table 6: Results of each sensitivity analyses, showing the total number of deaths averted for each country or area, expected mortality rate per 100,000 population and the % expected deaths averted by vaccination for the population aged 25 years and older, in 34 WHO European Region countries, areas and territories (CAT), for weeks 50/2020 to 12/2023.

| Countries, areas and territories | Sensitivity analysis | Deaths   |         | Mortality rate |          |                   |
|----------------------------------|----------------------|----------|---------|----------------|----------|-------------------|
|                                  |                      | Reported | Averted | Reported       | Expected | Percentage change |
| Austria                          | 1                    | 17,218   | 41,505  | 249            | 849      | 71                |
|                                  | 2                    | 17,218   | 13,632  | 249            | 446      | 44                |
|                                  | 3                    | 17,218   | 22,089  | 249            | 568      | 56                |
|                                  | 4                    | 17,218   | 29,341  | 249            | 673      | 63                |
|                                  | 5                    | 17,218   | 27,201  | 249            | 642      | 61                |
|                                  | 6                    | 17,218   | 19,607  | 249            | 533      | 53                |
|                                  | 7                    | 17,218   | 18,342  | 249            | 514      | 52                |
|                                  | 8                    | 17,218   | 22,914  | 249            | 580      | 57                |
| Belgium                          | 1                    | 15,921   | 58,638  | 179            | 837      | 79                |
|                                  | 2                    | 15,921   | 14,691  | 179            | 343      | 48                |
|                                  | 3                    | 15,921   | 26,167  | 179            | 472      | 62                |
|                                  | 4                    | 15,921   | 34,163  | 179            | 562      | 68                |
|                                  | 5                    | 15,921   | 32,247  | 179            | 540      | 67                |
|                                  | 6                    | 15,921   | 22,438  | 179            | 430      | 58                |
|                                  | 7                    | 15,921   | 20,259  | 179            | 406      | 56                |
|                                  | 8                    | 15,921   | 26,397  | 179            | 475      | 62                |
| Croatia                          | 1                    | 4,805    | 5,163   | 139            | 288      | 52                |
|                                  | 2                    | 4,805    | 2,417   | 139            | 209      | 33                |
|                                  | 3                    | 4,805    | 3,586   | 139            | 242      | 43                |
|                                  | 4                    | 4,805    | 4,063   | 139            | 256      | 46                |
|                                  | 5                    | 4,805    | 4,112   | 139            | 258      | 46                |
|                                  | 6                    | 4,805    | 3,119   | 139            | 229      | 39                |

| Countries, areas and territories | Sensitivity analysis | Deaths   |         | Mortality rate |          |                   |
|----------------------------------|----------------------|----------|---------|----------------|----------|-------------------|
|                                  |                      | Reported | Averted | Reported       | Expected | Percentage change |
|                                  | 7                    | 4,805    | 3,084   | 139            | 228      | 39                |
|                                  | 8                    | 4,805    | 3,616   | 139            | 243      | 43                |
| Cyprus                           | 1                    | 1,490    | 4,964   | 251            | 1,086    | 77                |
|                                  | 2                    | 1,490    | 1,425   | 251            | 491      | 49                |
|                                  | 3                    | 1,490    | 2,687   | 251            | 703      | 64                |
|                                  | 4                    | 1,490    | 3,046   | 251            | 763      | 67                |
|                                  | 5                    | 1,490    | 3,150   | 251            | 781      | 68                |
|                                  | 6                    | 1,490    | 2,200   | 251            | 621      | 60                |
|                                  | 7                    | 1,490    | 2,178   | 251            | 617      | 59                |
|                                  | 8                    | 1,490    | 2,658   | 251            | 698      | 64                |
| Czechia                          | 1                    | 33,292   | 38,297  | 400            | 860      | 53                |
|                                  | 2                    | 33,292   | 15,827  | 400            | 590      | 32                |
|                                  | 3                    | 33,292   | 22,814  | 400            | 674      | 41                |
|                                  | 4                    | 33,292   | 31,575  | 400            | 779      | 49                |
|                                  | 5                    | 33,292   | 28,326  | 400            | 740      | 46                |
|                                  | 6                    | 33,292   | 21,657  | 400            | 660      | 39                |
|                                  | 7                    | 33,292   | 20,408  | 400            | 645      | 38                |
|                                  | 8                    | 33,292   | 24,663  | 400            | 696      | 43                |
| Denmark                          | 1                    | 7,119    | 36,958  | 156            | 964      | 84                |
|                                  | 2                    | 7,119    | 7,948   | 156            | 330      | 53                |
|                                  | 3                    | 7,119    | 16,364  | 156            | 514      | 70                |
|                                  | 4                    | 7,119    | 17,381  | 156            | 536      | 71                |
|                                  | 5                    | 7,119    | 18,377  | 156            | 558      | 72                |
|                                  | 6                    | 7,119    | 13,109  | 156            | 443      | 65                |



| Countries, areas and territories | Sensitivity analysis | Deaths   |         | Mortality rate |          |                   |
|----------------------------------|----------------------|----------|---------|----------------|----------|-------------------|
|                                  |                      | Reported | Averted | Reported       | Expected | Percentage change |
|                                  | 7                    | 7,119    | 11,590  | 156            | 409      | 62                |
|                                  | 8                    | 7,119    | 15,200  | 156            | 488      | 68                |
| Estonia                          | 1                    | 2,633    | 3,810   | 184            | 450      | 59                |
|                                  | 2                    | 2,633    | 1,571   | 184            | 294      | 37                |
|                                  | 3                    | 2,633    | 2,444   | 184            | 355      | 48                |
|                                  | 4                    | 2,633    | 2,887   | 184            | 386      | 52                |
|                                  | 5                    | 2,633    | 2,871   | 184            | 385      | 52                |
|                                  | 6                    | 2,633    | 2,119   | 184            | 332      | 45                |
|                                  | 7                    | 2,633    | 2,101   | 184            | 331      | 44                |
|                                  | 8                    | 2,633    | 2,486   | 184            | 358      | 49                |
| Finland                          | 1                    | 8,508    | 32,344  | 176            | 844      | 79                |
|                                  | 2                    | 8,508    | 10,935  | 176            | 402      | 56                |
|                                  | 3                    | 8,508    | 18,739  | 176            | 563      | 69                |
|                                  | 4                    | 8,508    | 19,774  | 176            | 585      | 70                |
|                                  | 5                    | 8,508    | 20,774  | 176            | 605      | 71                |
|                                  | 6                    | 8,508    | 15,380  | 176            | 494      | 64                |
|                                  | 7                    | 8,508    | 13,602  | 176            | 457      | 61                |
|                                  | 8                    | 8,508    | 17,539  | 176            | 538      | 67                |
| France                           | 1                    | 98,828   | 196,944 | 182            | 544      | 67                |
|                                  | 2                    | 98,828   | 64,285  | 182            | 300      | 39                |
|                                  | 3                    | 98,828   | 112,586 | 182            | 389      | 53                |
|                                  | 4                    | 98,828   | 128,343 | 182            | 418      | 56                |
|                                  | 5                    | 98,828   | 129,788 | 182            | 420      | 57                |
|                                  | 6                    | 98,828   | 96,457  | 182            | 359      | 49                |

| Countries, areas and territories | Sensitivity analysis | Deaths   |         | Mortality rate |          |                   |
|----------------------------------|----------------------|----------|---------|----------------|----------|-------------------|
|                                  |                      | Reported | Averted | Reported       | Expected | Percentage change |
|                                  | 7                    | 98,828   | 91,441  | 182            | 350      | 48                |
|                                  | 8                    | 98,828   | 111,667 | 182            | 387      | 53                |
| Germany                          | 1                    | 270,840  | 525,526 | 375            | 1,102    | 66                |
|                                  | 2                    | 270,840  | 188,096 | 375            | 635      | 41                |
|                                  | 3                    | 270,840  | 311,702 | 375            | 806      | 53                |
|                                  | 4                    | 270,840  | 365,162 | 375            | 880      | 57                |
|                                  | 5                    | 270,840  | 364,092 | 375            | 879      | 57                |
|                                  | 6                    | 270,840  | 261,388 | 375            | 737      | 49                |
|                                  | 7                    | 270,840  | 250,158 | 375            | 721      | 48                |
|                                  | 8                    | 270,840  | 308,914 | 375            | 802      | 53                |
| Greece                           | 1                    | 33,445   | 72,709  | 362            | 1,150    | 69                |
|                                  | 2                    | 33,445   | 26,636  | 362            | 651      | 44                |
|                                  | 3                    | 33,445   | 43,825  | 362            | 837      | 57                |
|                                  | 4                    | 33,445   | 51,012  | 362            | 915      | 60                |
|                                  | 5                    | 33,445   | 50,807  | 362            | 912      | 60                |
|                                  | 6                    | 33,445   | 38,031  | 362            | 774      | 53                |
|                                  | 7                    | 33,445   | 36,424  | 362            | 757      | 52                |
|                                  | 8                    | 33,445   | 43,961  | 362            | 838      | 57                |
| Hungary                          | 1                    | 41,228   | 43,302  | 532            | 1,090    | 51                |
|                                  | 2                    | 41,228   | 22,153  | 532            | 817      | 35                |
|                                  | 3                    | 41,228   | 30,282  | 532            | 922      | 42                |
|                                  | 4                    | 41,228   | 36,171  | 532            | 998      | 47                |
|                                  | 5                    | 41,228   | 35,249  | 532            | 986      | 46                |
|                                  | 6                    | 41,228   | 27,368  | 532            | 885      | 40                |

| Countries, areas and territories | Sensitivity analysis | Deaths   |         | Mortality rate |          |                   |
|----------------------------------|----------------------|----------|---------|----------------|----------|-------------------|
|                                  |                      | Reported | Averted | Reported       | Expected | Percentage change |
|                                  | 7                    | 41,228   | 25,862  | 532            | 865      | 38                |
|                                  | 8                    | 41,228   | 31,023  | 532            | 932      | 43                |
| Iceland                          | 1                    | 235      | 1,079   | 104            | 583      | 82                |
|                                  | 2                    | 235      | 244     | 104            | 212      | 51                |
|                                  | 3                    | 235      | 568     | 104            | 356      | 71                |
|                                  | 4                    | 235      | 568     | 104            | 356      | 71                |
|                                  | 5                    | 235      | 625     | 104            | 381      | 73                |
|                                  | 6                    | 235      | 412     | 104            | 287      | 64                |
|                                  | 7                    | 235      | 373     | 104            | 270      | 61                |
|                                  | 8                    | 235      | 512     | 104            | 331      | 69                |
| Ireland                          | 1                    | 6,002    | 18,309  | 200            | 808      | 75                |
|                                  | 2                    | 6,002    | 4,776   | 200            | 358      | 44                |
|                                  | 3                    | 6,002    | 9,139   | 200            | 503      | 60                |
|                                  | 4                    | 6,002    | 9,704   | 200            | 522      | 62                |
|                                  | 5                    | 6,002    | 10,330  | 200            | 543      | 63                |
|                                  | 6                    | 6,002    | 7,182   | 200            | 438      | 54                |
|                                  | 7                    | 6,002    | 6,714   | 200            | 423      | 53                |
|                                  | 8                    | 6,002    | 8,558   | 200            | 484      | 59                |
| Israel                           | 1                    | 18,066   | 99,123  | 1,390          | 9,014    | 85                |
|                                  | 2                    | 18,066   | 28,440  | 1,390          | 3,577    | 61                |
|                                  | 3                    | 18,066   | 49,076  | 1,390          | 5,164    | 73                |
|                                  | 4                    | 18,066   | 64,970  | 1,390          | 6,387    | 78                |
|                                  | 5                    | 18,066   | 62,578  | 1,390          | 6,203    | 78                |
|                                  | 6                    | 18,066   | 42,241  | 1,390          | 4,639    | 70                |

| Countries, areas and territories | Sensitivity analysis | Deaths   |         | Mortality rate |          |                   |
|----------------------------------|----------------------|----------|---------|----------------|----------|-------------------|
|                                  |                      | Reported | Averted | Reported       | Expected | Percentage change |
|                                  | 7                    | 18,066   | 40,714  | 1,390          | 4,521    | 69                |
|                                  | 8                    | 18,066   | 51,104  | 1,390          | 5,320    | 74                |
| Italy                            | 1                    | 131,583  | 359,171 | 245            | 913      | 73                |
|                                  | 2                    | 131,583  | 90,785  | 245            | 414      | 41                |
|                                  | 3                    | 131,583  | 175,512 | 245            | 571      | 57                |
|                                  | 4                    | 131,583  | 204,376 | 245            | 625      | 61                |
|                                  | 5                    | 131,583  | 208,509 | 245            | 633      | 61                |
|                                  | 6                    | 131,583  | 143,423 | 245            | 512      | 52                |
|                                  | 7                    | 131,583  | 134,870 | 245            | 496      | 51                |
|                                  | 8                    | 131,583  | 171,876 | 245            | 565      | 57                |
| Latvia                           | 1                    | 5,659    | 5,028   | 359            | 678      | 47                |
|                                  | 2                    | 5,659    | 2,356   | 359            | 508      | 29                |
|                                  | 3                    | 5,659    | 3,482   | 359            | 580      | 38                |
|                                  | 4                    | 5,659    | 4,193   | 359            | 625      | 43                |
|                                  | 5                    | 5,659    | 3,982   | 359            | 611      | 41                |
|                                  | 6                    | 5,659    | 3,299   | 359            | 568      | 37                |
|                                  | 7                    | 5,659    | 3,147   | 359            | 558      | 36                |
|                                  | 8                    | 5,659    | 3,621   | 359            | 588      | 39                |
| Lithuania                        | 1                    | 8,195    | 8,447   | 357            | 726      | 51                |
|                                  | 2                    | 8,195    | 4,292   | 357            | 545      | 34                |
|                                  | 3                    | 8,195    | 6,036   | 357            | 621      | 43                |
|                                  | 4                    | 8,195    | 7,169   | 357            | 670      | 47                |
|                                  | 5                    | 8,195    | 6,938   | 357            | 660      | 46                |
|                                  | 6                    | 8,195    | 5,564   | 357            | 600      | 40                |

| Countries, areas and territories | Sensitivity analysis | Deaths   |         | Mortality rate |          |                   |
|----------------------------------|----------------------|----------|---------|----------------|----------|-------------------|
|                                  |                      | Reported | Averted | Reported       | Expected | Percentage change |
|                                  | 7                    | 8,195    | 5,587   | 357            | 601      | 41                |
|                                  | 8                    | 8,195    | 6,289   | 357            | 632      | 44                |
| Luxembourg                       | 1                    | 754      | 2,253   | 196            | 780      | 75                |
|                                  | 2                    | 754      | 547     | 196            | 337      | 42                |
|                                  | 3                    | 754      | 1,097   | 196            | 480      | 59                |
|                                  | 4                    | 754      | 1,290   | 196            | 530      | 63                |
|                                  | 5                    | 754      | 1,299   | 196            | 533      | 63                |
|                                  | 6                    | 754      | 868     | 196            | 421      | 53                |
|                                  | 7                    | 754      | 794     | 196            | 402      | 51                |
|                                  | 8                    | 754      | 1,064   | 196            | 472      | 58                |
| Malta                            | 1                    | 504      | 2,589   | 391            | 2,399    | 84                |
|                                  | 2                    | 504      | 595     | 391            | 852      | 54                |
|                                  | 3                    | 504      | 1,233   | 391            | 1,347    | 71                |
|                                  | 4                    | 504      | 1,301   | 391            | 1,400    | 72                |
|                                  | 5                    | 504      | 1,436   | 391            | 1,505    | 74                |
|                                  | 6                    | 504      | 904     | 391            | 1,092    | 64                |
|                                  | 7                    | 504      | 878     | 391            | 1,072    | 64                |
|                                  | 8                    | 504      | 1,147   | 391            | 1,281    | 69                |
| North Macedonia                  | 1                    | 7,592    | 4,012   | 1,725          | 2,637    | 35                |
|                                  | 2                    | 7,592    | 2,428   | 1,725          | 2,277    | 24                |
|                                  | 3                    | 7,592    | 3,108   | 1,725          | 2,431    | 29                |
|                                  | 4                    | 7,592    | 3,596   | 1,725          | 2,542    | 32                |
|                                  | 5                    | 7,592    | 3,486   | 1,725          | 2,517    | 31                |
|                                  | 6                    | 7,592    | 2,944   | 1,725          | 2,394    | 28                |

| Countries, areas and territories | Sensitivity analysis | Deaths   |         | Mortality rate |          |                   |
|----------------------------------|----------------------|----------|---------|----------------|----------|-------------------|
|                                  |                      | Reported | Averted | Reported       | Expected | Percentage change |
|                                  | 7                    | 7,592    | 2,910   | 1,725          | 2,386    | 28                |
|                                  | 8                    | 7,592    | 3,221   | 1,725          | 2,457    | 30                |
| Netherlands                      | 1                    | 12,990   | 39,614  | 94             | 381      | 75                |
|                                  | 2                    | 12,990   | 9,264   | 94             | 161      | 42                |
|                                  | 3                    | 12,990   | 18,122  | 94             | 226      | 58                |
|                                  | 4                    | 12,990   | 20,958  | 94             | 246      | 62                |
|                                  | 5                    | 12,990   | 22,246  | 94             | 256      | 63                |
|                                  | 6                    | 12,990   | 13,212  | 94             | 190      | 51                |
|                                  | 7                    | 12,990   | 13,529  | 94             | 192      | 51                |
|                                  | 8                    | 12,990   | 17,255  | 94             | 219      | 57                |
| Portugal                         | 1                    | 21,347   | 60,323  | 336            | 1,285    | 74                |
|                                  | 2                    | 21,347   | 14,082  | 336            | 558      | 40                |
|                                  | 3                    | 21,347   | 28,165  | 336            | 779      | 57                |
|                                  | 4                    | 21,347   | 31,819  | 336            | 837      | 60                |
|                                  | 5                    | 21,347   | 32,867  | 336            | 853      | 61                |
|                                  | 6                    | 21,347   | 22,834  | 336            | 695      | 52                |
|                                  | 7                    | 21,347   | 20,880  | 336            | 665      | 49                |
|                                  | 8                    | 21,347   | 27,044  | 336            | 762      | 56                |
| Republic of Moldova              | 1                    | 11,966   | 4,026   | 1,688          | 2,256    | 25                |
|                                  | 2                    | 11,966   | 2,552   | 1,688          | 2,048    | 18                |
|                                  | 3                    | 11,966   | 3,280   | 1,688          | 2,151    | 22                |
|                                  | 4                    | 11,966   | 3,620   | 1,688          | 2,199    | 23                |
|                                  | 5                    | 11,966   | 3,552   | 1,688          | 2,189    | 23                |
|                                  | 6                    | 11,966   | 3,090   | 1,688          | 2,124    | 21                |

| Countries, areas and territories | Sensitivity analysis | Deaths   |         | Mortality rate |          |                   |
|----------------------------------|----------------------|----------|---------|----------------|----------|-------------------|
|                                  |                      | Reported | Averted | Reported       | Expected | Percentage change |
|                                  | 7                    | 11,966   | 3,056   | 1,688          | 2,119    | 20                |
|                                  | 8                    | 11,966   | 3,342   | 1,688          | 2,160    | 22                |
| Romania                          | 1                    | 51,144   | 14,883  | 519            | 670      | 23                |
|                                  | 2                    | 51,144   | 9,809   | 519            | 618      | 16                |
|                                  | 3                    | 51,144   | 12,430  | 519            | 645      | 20                |
|                                  | 4                    | 51,144   | 13,601  | 519            | 657      | 21                |
|                                  | 5                    | 51,144   | 13,427  | 519            | 655      | 21                |
|                                  | 6                    | 51,144   | 11,499  | 519            | 636      | 18                |
|                                  | 7                    | 51,144   | 11,727  | 519            | 638      | 19                |
|                                  | 8                    | 51,144   | 12,628  | 519            | 647      | 20                |
| Slovakia                         | 1                    | 17,768   | 9,092   | 462            | 699      | 34                |
|                                  | 2                    | 17,768   | 5,377   | 462            | 602      | 23                |
|                                  | 3                    | 17,768   | 6,603   | 462            | 634      | 27                |
|                                  | 4                    | 17,768   | 8,711   | 462            | 689      | 33                |
|                                  | 5                    | 17,768   | 7,772   | 462            | 664      | 30                |
|                                  | 6                    | 17,768   | 6,641   | 462            | 635      | 27                |
|                                  | 7                    | 17,768   | 6,364   | 462            | 628      | 26                |
|                                  | 8                    | 17,768   | 7,174   | 462            | 649      | 29                |
| Slovenia                         | 1                    | 7,252    | 7,411   | 417            | 844      | 51                |
|                                  | 2                    | 7,252    | 3,510   | 417            | 619      | 33                |
|                                  | 3                    | 7,252    | 5,209   | 417            | 717      | 42                |
|                                  | 4                    | 7,252    | 5,945   | 417            | 760      | 45                |
|                                  | 5                    | 7,252    | 5,946   | 417            | 760      | 45                |
|                                  | 6                    | 7,252    | 4,551   | 417            | 679      | 39                |

| Countries, areas and territories | Sensitivity analysis | Deaths   |         | Mortality rate |          |                   |
|----------------------------------|----------------------|----------|---------|----------------|----------|-------------------|
|                                  |                      | Reported | Averted | Reported       | Expected | Percentage change |
|                                  | 7                    | 7,252    | 4,502   | 417            | 677      | 38                |
|                                  | 8                    | 7,252    | 5,253   | 417            | 720      | 42                |
| Spain                            | 1                    | 70,258   | 313,314 | 189            | 1,031    | 82                |
|                                  | 2                    | 70,258   | 59,381  | 189            | 349      | 46                |
|                                  | 3                    | 70,258   | 130,653 | 189            | 540      | 65                |
|                                  | 4                    | 70,258   | 141,751 | 189            | 570      | 67                |
|                                  | 5                    | 70,258   | 153,809 | 189            | 602      | 69                |
|                                  | 6                    | 70,258   | 98,189  | 189            | 453      | 58                |
|                                  | 7                    | 70,258   | 98,366  | 189            | 453      | 58                |
|                                  | 8                    | 70,258   | 124,198 | 189            | 523      | 64                |
| Sweden                           | 1                    | 16,109   | 28,194  | 200            | 549      | 64                |
|                                  | 2                    | 16,109   | 11,534  | 200            | 343      | 42                |
|                                  | 3                    | 16,109   | 18,077  | 200            | 424      | 53                |
|                                  | 4                    | 16,109   | 19,178  | 200            | 437      | 54                |
|                                  | 5                    | 16,109   | 20,314  | 200            | 451      | 56                |
|                                  | 6                    | 16,109   | 14,512  | 200            | 380      | 47                |
|                                  | 7                    | 16,109   | 13,874  | 200            | 372      | 46                |
|                                  | 8                    | 16,109   | 17,212  | 200            | 413      | 52                |
| Switzerland                      | 1                    | 8,681    | 14,327  | 393            | 1,042    | 62                |
|                                  | 2                    | 8,681    | 4,940   | 393            | 617      | 36                |
|                                  | 3                    | 8,681    | 7,925   | 393            | 752      | 48                |
|                                  | 4                    | 8,681    | 10,239  | 393            | 857      | 54                |
|                                  | 5                    | 8,681    | 9,649   | 393            | 830      | 53                |
|                                  | 6                    | 8,681    | 7,116   | 393            | 716      | 45                |



| Countries, areas and territories | Sensitivity analysis | Deaths   |         | Mortality rate |          |                   |
|----------------------------------|----------------------|----------|---------|----------------|----------|-------------------|
|                                  |                      | Reported | Averted | Reported       | Expected | Percentage change |
|                                  | 7                    | 8,681    | 6,731   | 393            | 698      | 44                |
|                                  | 8                    | 8,681    | 8,254   | 393            | 767      | 49                |
| United Kingdom (England)         | 1                    | 174,800  | 811,388 | 1,271          | 7,173    | 82                |
|                                  | 2                    | 174,800  | 208,058 | 1,271          | 2,785    | 54                |
|                                  | 3                    | 174,800  | 375,196 | 1,271          | 4,000    | 68                |
|                                  | 4                    | 174,800  | 428,954 | 1,271          | 4,391    | 71                |
|                                  | 5                    | 174,800  | 441,085 | 1,271          | 4,479    | 72                |
|                                  | 6                    | 174,800  | 300,958 | 1,271          | 3,460    | 63                |
|                                  | 7                    | 174,800  | 274,297 | 1,271          | 3,266    | 61                |
|                                  | 8                    | 174,800  | 357,990 | 1,271          | 3,875    | 67                |
| United Kingdom (Scotland)        | 1                    | 20,186   | 100,946 | 1,407          | 8,444    | 83                |
|                                  | 2                    | 20,186   | 23,556  | 1,407          | 3,049    | 54                |
|                                  | 3                    | 20,186   | 45,473  | 1,407          | 4,577    | 69                |
|                                  | 4                    | 20,186   | 49,938  | 1,407          | 4,888    | 71                |
|                                  | 5                    | 20,186   | 52,391  | 1,407          | 5,059    | 72                |
|                                  | 6                    | 20,186   | 35,443  | 1,407          | 3,878    | 64                |
|                                  | 7                    | 20,186   | 33,281  | 1,407          | 3,727    | 62                |
|                                  | 8                    | 20,186   | 42,796  | 1,407          | 4,391    | 68                |
| Ukraine                          | 1                    | 164,230  | 32,016  | 1,794          | 2,144    | 16                |
|                                  | 2                    | 164,230  | 22,694  | 1,794          | 2,042    | 12                |
|                                  | 3                    | 164,230  | 25,788  | 1,794          | 2,076    | 14                |
|                                  | 4                    | 164,230  | 31,474  | 1,794          | 2,138    | 16                |
|                                  | 5                    | 164,230  | 28,698  | 1,794          | 2,108    | 15                |
|                                  | 6                    | 164,230  | 26,476  | 1,794          | 2,084    | 14                |

| Countries, areas and territories | Sensitivity analysis | Deaths    |           | Mortality rate |          |                   |
|----------------------------------|----------------------|-----------|-----------|----------------|----------|-------------------|
|                                  |                      | Reported  | Averted   | Reported       | Expected | Percentage change |
|                                  | 7                    | 164,230   | 25,034    | 1,794          | 2,068    | 13                |
|                                  | 8                    | 164,230   | 27,340    | 1,794          | 2,093    | 14                |
| Kosovo <sup>[1]</sup>            | 1                    | 1,699     | 553       | 346            | 458      | 24                |
|                                  | 2                    | 1,699     | 307       | 346            | 408      | 15                |
|                                  | 3                    | 1,699     | 397       | 346            | 426      | 19                |
|                                  | 4                    | 1,699     | 518       | 346            | 451      | 23                |
|                                  | 5                    | 1,699     | 473       | 346            | 442      | 22                |
|                                  | 6                    | 1,699     | 400       | 346            | 427      | 19                |
|                                  | 7                    | 1,699     | 394       | 346            | 426      | 19                |
|                                  | 8                    | 1,699     | 432       | 346            | 434      | 20                |
| Total                            | 1                    | 1,292,347 | 2,996,258 | 365            | 1,210    | 70                |
|                                  | 2                    | 1,292,347 | 879,143   | 365            | 613      | 40                |
|                                  | 3                    | 1,292,347 | 1,539,854 | 365            | 799      | 54                |
|                                  | 4                    | 1,292,347 | 1,786,791 | 365            | 869      | 58                |
|                                  | 5                    | 1,292,347 | 1,808,406 | 365            | 875      | 58                |
|                                  | 6                    | 1,292,347 | 1,274,631 | 365            | 724      | 50                |
|                                  | 7                    | 1,292,347 | 1,203,471 | 365            | 704      | 48                |
|                                  | 8                    | 1,292,347 | 1,509,348 | 365            | 791      | 54                |

<sup>[1]</sup> All references to Kosovo in this document should be understood to be in the context of the United Nations Security Council resolution 1244 (1999).

Scenario descriptions: 1: High VE values; 2: Low VE values; 3: Long lag time; 4: Short lag time; 5: Long vaccine waning time; 6: Short vaccine waning time; 7: High prior immunity; 8: Low prior immunity

Supplementary table 7: initial Vaccine Effectiveness (VE) against mortality values identified in the literature according to vaccine dose and dominant variant.

| Authors                                | Year      | Country                                      | Sudy population                                             | Comparison population                      | Vaccines used                                        | Variant      | VE values                                                                                        |
|----------------------------------------|-----------|----------------------------------------------|-------------------------------------------------------------|--------------------------------------------|------------------------------------------------------|--------------|--------------------------------------------------------------------------------------------------|
| <a href="#">Amodio et al</a>           | 2022      | Italy (Sicily)                               | Adults                                                      | Unvaccinated                               | Pfizer–BioNTech;<br>AstraZeneca;<br>Moderna; Janssen | Alpha, Delta | VE2 (Alpha): 93%                                                                                 |
| <a href="#">Andersson et al</a>        | pre-print | Denmark,<br>Finland,<br>Norway and<br>Sweden | 50+ with 2 boosters                                         | 50+ with 1<br>booster                      | Pfizer -BioNTech<br>(Comirnaty BA.1 and<br>BA4.5)    | Omicron      | VE4 (Omicron): 78%<br>VE4 (Omicron): 80%                                                         |
| <a href="#">Andrews et al</a>          | 2022      | England                                      | 16 years and older<br>(prior vaccination<br>not compulsory) | Symptomatic<br>but test<br>negative on PCR | Pfizer–BioNTech;<br>AstraZeneca;<br>Moderna          | Alpha, Delta | VE2 (Delta): 95%<br>VE2 (Delta): 94%<br>VE2 (Delta): 99%<br>VE2 (Delta): 97%                     |
| <a href="#">Arbel et al</a>            | 2022      | Israel                                       | 60+ with 2 boosters                                         | 60+ with 1<br>booster                      | Pfizer–BioNTech                                      | Omicron      | VE4 (Omicron): 78%                                                                               |
| <a href="#">Berec et al</a>            | 2022      | Czechia                                      | 12+ years                                                   | Unvaccinated                               | Pfizer–BioNTech;<br>AstraZeneca;<br>Moderna; Janssen | Alpha, Delta | VE2 (Alpha): 92%<br>VE2 (Alpha): 96%<br>VE2 (Alpha): 93%<br>VE2 (Alpha): 68%<br>VE3 (Delta): 97% |
| <a href="#">Glatman-Freedman et al</a> | 2021      | Israel                                       | 16+ population &<br>no prior positive<br>PCR                | Unvaccinated                               | Pfizer–BioNTech                                      | Alpha        | VE1 (Alpha): 72%<br>VE2 (Alpha): 92%                                                             |
| <a href="#">Goldberg et al</a>         | 2022      | Israel                                       | 16 years and older<br>(prior vaccination<br>not compulsory) | Unvaccinated                               | Pfizer–BioNTech                                      | Alpha        | VE1 (Alpha): 70%<br>VE2 (Alpha): 95%                                                             |
| <a href="#">Hulme et al</a>            | pre-print | UK                                           | 18+ with complete<br>series                                 | Unvaccinated                               | Pfizer–BioNTech;<br>AstraZeneca                      | Delta        | VE3 (Delta): 89%                                                                                 |

|                               |           |             |                                                      |                           |                                                |                       |                                                                                                            |
|-------------------------------|-----------|-------------|------------------------------------------------------|---------------------------|------------------------------------------------|-----------------------|------------------------------------------------------------------------------------------------------------|
| <a href="#">Kaura et al</a>   | 2022      | UK (London) | 16+ years, no previous infection, no Moderna vaccine | Unvaccinated              | Pfizer–BioNTech; AstraZeneca                   | Alpha                 | VE1 (Alpha): 86%<br>VE1 (Alpha): 86%                                                                       |
| <a href="#">Kislaya et al</a> | 2022      | Portugal    | 60+ years                                            | Unvaccinated              | Pfizer–BioNTech; AstraZeneca; Moderna; Janssen | Omicron               | VE3 (Omicron): 59%<br>VE4 (Omicron): 65%                                                                   |
| <a href="#">Liu et al</a>     | pre-print | Australia   | 65+ & one dose                                       | Unvaccinated              | Pfizer–BioNTech; AstraZeneca; Moderna          | Omicron               | VE2 (Omicron): 73%<br>VE3 (Omicron): 93%<br>VE3 (Omicron): 75%<br>VE4 (Omicron): 93%<br>VE4 (Omicron): 84% |
| <a href="#">Lytras et al</a>  | 2022      | Greece      | General population                                   | Unvaccinated              | Pfizer–BioNTech; AstraZeneca; Moderna; Janssen | Alpha, Delta, Omicron | VE1 (Alpha): 65%<br>VE2 (Alpha): 90%<br>VE2 (Delta): 84%<br>VE3 (Delta): 98%                               |
| <a href="#">Machado et al</a> | 2022      | Portugal    | 65+                                                  | Unvaccinated              | Pfizer–BioNTech; AstraZeneca; Moderna; Janssen | Alpha                 | VE2 (Alpha): 81%<br>VE2 (Alpha): 95%<br>VE2 (Alpha): 95%                                                   |
| <a href="#">Magen et al</a>   | 2022      | Israel      | 60+ years and four doses                             | 60+ years and three doses | Pfizer–BioNTech                                | Omicron               | VE4 (Omicron): 74%                                                                                         |
| <a href="#">Monge et al</a>   | 2022      | Spain       | 50-59 & complete series                              |                           | Pfizer–BioNTech; AstraZeneca; Moderna; Janssen | Alpha                 | VE2 (Alpha): 89%<br>VE2 (Alpha): 94%<br>VE2 (Alpha): 97%                                                   |

|                              |           |             |                                                              |                                         |                                                                      |         |                                                                                                                                                                                                                                                                                        |
|------------------------------|-----------|-------------|--------------------------------------------------------------|-----------------------------------------|----------------------------------------------------------------------|---------|----------------------------------------------------------------------------------------------------------------------------------------------------------------------------------------------------------------------------------------------------------------------------------------|
| <a href="#">Park et al</a>   | 2023      | South Korea | 60+ & vaccination with Pfizer–BioNTech; AstraZeneca; Moderna | Unvaccinated                            | Pfizer–BioNTech; AstraZeneca; Moderna                                | Omicron | VE2 (Omicron): 65%<br>VE2 (Omicron): 70%<br>VE3 (Omicron): 95%<br>VE3 (Omicron): 94%<br>VE3 (Omicron): 89%<br>VE4 (Omicron): 96%<br>VE4 (Omicron): 95%<br>VE4 (Omicron): 91%                                                                                                           |
| <a href="#">Poukka et al</a> | pre-print | Finland     | 65+ with complete series and 1+ booster                      | 65+ with complete series and no booster | Pfizer -BioNTech (Comirnaty BA.1 and BA4.5)                          | Omicron | VE3 (Omicron): 66%                                                                                                                                                                                                                                                                     |
| <a href="#">Russo et al</a>  | 2022      | Italy       | Adults 19+, not nursing home residents                       | Unvaccinated                            | Unreported                                                           | Omicron | VE3 (Omicron): 67%                                                                                                                                                                                                                                                                     |
| <a href="#">Sheikh et al</a> | 2021      | Scotland    | Adults with at least one dose                                | Adults and unvaccinated                 | Pfizer–BioNTech; AstraZeneca                                         | Delta   | VE2 (Delta): 91%                                                                                                                                                                                                                                                                       |
| <a href="#">Voko et al</a>   | 2022      | Hungary     | Adults aged 18 to 100                                        | Unvaccinated                            | Pfizer–BioNTech; Sinopharm; Sputnik-V; AstraZeneca; Moderna; Janssen | Delta   | VE1 (Delta) <65: 92% + 92% + 100% + 96% + 87% + 57%<br>VE2 (Delta) <65: 88% + 85% + 100% + 100%<br>VE2 (Delta) <65: 100% + 73% + 86%<br>VE1 (Delta) >65: 86% + 98% + 100% + 98% + 84% + 55%<br>VE2 (Delta) >65: 92% + 95% + 92% + 97%<br>VE2 (Delta) >65: 83% + 100% + 26% + 82% + 94% |

|                                          |      |     |                                 |              |                             |                |                                                                                  |
|------------------------------------------|------|-----|---------------------------------|--------------|-----------------------------|----------------|----------------------------------------------------------------------------------|
| <a href="#">Youg-Xu<br/><i>et al</i></a> | 2022 | USA | Veterans (largely<br>65+ years) | Unvaccinated | Pfizer–BioNTech;<br>Moderna | Delta, Omicron | VE2 (Delta): 92%<br>VE2 (Omicron): 77%<br>VE3 (Delta): 96%<br>VE3 (Omicron): 94% |
|------------------------------------------|------|-----|---------------------------------|--------------|-----------------------------|----------------|----------------------------------------------------------------------------------|
